# Supplementary material
Source: HighWire-hosted journal article supplement (https://www.cmaj.ca/highwire/filestream/148093/field_highwire_adjunct_files/0/220928-res-1-at.pdf)

## Appendix Figures and Tables: Index

| Item       | Contents                                                                 | Page |
|------------|--------------------------------------------------------------------------|------|
| Table 1.   | Components of composite severe maternal morbidity and associated codes.  | 2    |
| Table 2.   | Components of composite serious neonatal morbidity and associated codes. | 4    |
| Table 3.   | Variables used for restriction and adjustment and associated codes.      | 5    |
| Table 4.   | Results of negative binomial regression (without adjustment for volume). | 5    |
| Table 5.   | Results of negative binomial regression (without adjustment for tiers).  | 6    |
| Table 6.   | Outlier hospitals for SMM by tier and province/territories.              | 7    |
| Table 7.   | Outlier hospitals for SMM by modified tier, Canada (excluding Quebec).   | 9    |
| Table 8.   | Outlier hospitals for NMM by tier and province/territories.              | 10   |
| Table 9.   | Outlier hospitals for NMM by modified tier, Canada (excluding Quebec).   | 12   |
| Figure 1.  | SMM* and NMM* rates by tiers of service, Canada (excluding Quebec).      | 13   |
| Figure 2.  | SMM and NMM rates by hospital volume, Canada (excluding Quebec).         | 14   |
| Figure 3.  | SMM and NMM rates by tiers of service, British Columbia.                 | 15   |
| Figure 4.  | SMM and NMM rates by tiers of service, Alberta.                          | 16   |
| Figure 5.  | SMM and NMM rates by tiers of service, Saskatchewan.                     | 17   |
| Figure 6.  | SMM and NMM rates by tiers of service, Manitoba.                         | 18   |
| Figure 7.  | SMM and NMM rates by tiers of service, Ontario.                          | 19   |
| Figure 8.  | SMM and NMM rates by tiers of service, New Brunswick.                    | 20   |
| Figure 9.  | SMM and NMM rates by tiers of service, Nova Scotia.                      | 21   |
| Figure 10. | SMM and NMM rates by tiers of service, Prince Edward Island.             | 22   |
| Figure 11. | SMM and NMM rates by tiers of service, Newfoundland and Labrador.        | 23   |
| Figure 12. | SMM and NMM rates by tiers of service, Combined Territories.             | 24   |
| Figure 13. | SMM and NMM rates by hospital volume, British Columbia.                  | 25   |
| Figure 14. | SMM and NMM rates by tiers of service, Alberta.                          | 26   |
| Figure 15. | SMM and NMM rates by tiers of service, Saskatchewan.                     | 27   |
| Figure 16. | SMM and NMM rates by tiers of service, Manitoba.                         | 28   |
| Figure 17. | SMM and NMM rates by tiers of service, Ontario.                          | 29   |
| Figure 18. | SMM and NMM rates by tiers of service, New Brunswick.                    | 30   |
| Figure 19. | SMM and NMM rates by tiers of service, Nova Scotia.                      | 31   |
| Figure 20. | SMM and NMM rates by tiers of service, Prince Edward Island.             | 32   |
| Figure 21. | SMM and NMM rates by tiers of service, Newfoundland and Labrador.        | 33   |
| Figure 22. | SMM and NMM rates by tiers of service, Combined Territories.             | 34   |

\* SMM denotes composite severe maternal morbidity and maternal morbidity and NMM denotes composite serious neonatal morbidity and neonatal mortality.

Table 1. Components of composite severe maternal morbidity and associated International Classification of Diseases (ICD-10 CA), and Canadian Classification of Intervention (CCI) codes. Note: This list of severe maternal morbidity components is a modified version of the list proposed by the Canadian Perinatal Surveillance System<sup>23</sup> (it does not include maternal Intensive Care Unit admission).

| Severe maternal morbidity subtypes                                                       | Diagnosis (ICD-10CA), procedure (CCI) codes and other variables                                                                                                                                                                                                                                                                                                                                                      |
|------------------------------------------------------------------------------------------|----------------------------------------------------------------------------------------------------------------------------------------------------------------------------------------------------------------------------------------------------------------------------------------------------------------------------------------------------------------------------------------------------------------------|
| Placenta previa with hemorrhage with RBC transfusion                                     | O44.1 + RBCTRNSF='Y'                                                                                                                                                                                                                                                                                                                                                                                                 |
| Placental abruption with coagulation defect                                              | O45.0                                                                                                                                                                                                                                                                                                                                                                                                                |
| Antepartum hemorrhage with coagulation defect                                            | O46.0                                                                                                                                                                                                                                                                                                                                                                                                                |
| Intrapartum hemorrhage with coagulation defect                                           | O67.0                                                                                                                                                                                                                                                                                                                                                                                                                |
| Intrapartum hemorrhage with RBC transfusion                                              | O67 + RBCTRNSF='Y'                                                                                                                                                                                                                                                                                                                                                                                                   |
| Postpartum hemorrhage with (RBC transfusion or procedures to the uterus or hysterectomy) | O72 + any of the following: <ul style="list-style-type: none"> <li>• RBCTRNSF='Y', or</li> <li>• (1.RM.13, 1.KT.51, 5.PC.91.LA or 5.PC.91.HV) + RBCTRNSF = 1, or</li> <li>• (5.MD.60.RC, 5.MD.60.RD, 5.MD.60.KE, 5.MD.60.CB or 1.RM.89.LA<sup>b</sup>), or</li> <li>• 1.RM.87.LA-GX</li> </ul> <sup>b</sup> Note: 1.RM.89.LA is included only if codes 1.PL.74, 1.RS.74 or 1.RS.80 are NOT also present              |
| Curettage with RBC transfusion                                                           | (5.PC.91.GA, 5.PC.91.GC or 5.PC.91.GD) + RBCTRNSF='Y'                                                                                                                                                                                                                                                                                                                                                                |
| Complications of obstetric surgery and procedures                                        | O75.4                                                                                                                                                                                                                                                                                                                                                                                                                |
| Repair of bladder, urethra, or intestine                                                 | 5.PC.80.JR, 1.NK.80 or 1.NM.80                                                                                                                                                                                                                                                                                                                                                                                       |
| Evacuation of incisional hematoma with RBC transfusion                                   | 5.PC.73.JS + RBCTRNSF='Y'                                                                                                                                                                                                                                                                                                                                                                                            |
| Re-closure of caesarean wound                                                            | (5.PC.80.JM or 5.PC.80.JH) + RBCTRNSF='Y'                                                                                                                                                                                                                                                                                                                                                                            |
| Rupture of the uterus with (RBC transfusion or procedures to the uterus or hysterectomy) | (O71.0 or O71.1) + any of the following: <ul style="list-style-type: none"> <li>• RBCTRNSF='Y', or</li> <li>• (1.RM.13, 1.KT.51, 5.PC.91.LA or 5.PC.91.HV) + RBCTRNSF='Y', or</li> <li>• (5.MD.60.RC, 5.MD.60.RD, 5.MD.60.KE, 5.MD.60.CB or 1.RM.89.LA<sup>a</sup>), or</li> <li>• 1.RM.87.LA-GX</li> </ul> <sup>a</sup> Note: 1.RM.89.LA is included only if codes 1.PL.74, 1.RS.74 or 1.RS.80 are NOT also present |

| <b>Severe maternal morbidity subtypes</b>                                                                            | <b>Diagnosis (ICD-10CA), procedure (CCI) codes and other variables</b>                                                                                                                                                                                          |
|----------------------------------------------------------------------------------------------------------------------|-----------------------------------------------------------------------------------------------------------------------------------------------------------------------------------------------------------------------------------------------------------------|
| Hysterectomy                                                                                                         | 5.MD.60.RC, 5.MD.60.RD, 5.MD.60.KE, 5.MD.60.CB, 1.RM.89.LA <sup>c</sup> (exclude if 1.PL.74, 1.RS.74 or 1.RS.80 code also present) or 1.RM.87.LA-GX<br><sup>c</sup> Note: 1.RM.89.LA is included only if codes 1.PL.74, 1.RS.74 or 1.RS.80 are NOT also present |
| HIV disease                                                                                                          | B20-24                                                                                                                                                                                                                                                          |
| Septicemia during labour                                                                                             | O75.3                                                                                                                                                                                                                                                           |
| Puerperal sepsis                                                                                                     | O85                                                                                                                                                                                                                                                             |
| Obstetric embolism                                                                                                   | O88                                                                                                                                                                                                                                                             |
| Obstetric shock                                                                                                      | O75.1, R57, T80.5 or T88.6                                                                                                                                                                                                                                      |
| Disseminated intravascular coagulation                                                                               | D65                                                                                                                                                                                                                                                             |
| Acute renal failure                                                                                                  | O90.4, N17, N19 or N99.0                                                                                                                                                                                                                                        |
| Dialysis                                                                                                             | 1.PZ.21                                                                                                                                                                                                                                                         |
| Sickle cell anemia with crisis                                                                                       | D57.0                                                                                                                                                                                                                                                           |
| Acute psychosis                                                                                                      | F53.1 or F23                                                                                                                                                                                                                                                    |
| Status epilepticus                                                                                                   | G41                                                                                                                                                                                                                                                             |
| Cardiac conditions                                                                                                   | O74.2, O89.1, O90.3, I21, I22, I42, I43, I46, I49.0, I50, J81, 1.HZ.09, 1.HZ.30                                                                                                                                                                                 |
| Cerebrovascular diseases: subarachnoid and intracranial hemorrhage, cerebral infarction, stroke                      | I60, I61, I62, I63 or I64                                                                                                                                                                                                                                       |
| Cerebral edema or coma                                                                                               | G93.6 or R40.2                                                                                                                                                                                                                                                  |
| Cerebral venous thrombosis in pregnancy, or in the puerperium                                                        | O22.5 or O87.3                                                                                                                                                                                                                                                  |
| Acute abdomen                                                                                                        | K35, K37, K65, N73.3 or N73.5                                                                                                                                                                                                                                   |
| Acute fatty liver with (RBC transfusion or plasma transfusion)                                                       | O26.6 + (RBCTRNSF='Y' or PLSTRNSF='Y')                                                                                                                                                                                                                          |
| Hepatic failure                                                                                                      | K71 or K72                                                                                                                                                                                                                                                      |
| Status asthmaticus                                                                                                   | J45.01, J45.11, J45.81 or J45.91                                                                                                                                                                                                                                |
| Adult respiratory distress syndrome                                                                                  | J80                                                                                                                                                                                                                                                             |
| Assisted ventilation through endotracheal tube                                                                       | 1.GZ.31.CA-ND                                                                                                                                                                                                                                                   |
| Assisted ventilation through tracheostomy                                                                            | 1.GZ.31.CR-ND                                                                                                                                                                                                                                                   |
| Pulmonary, cardiac, and CNS complications of anaesthesia during pregnancy, or labour and delivery or the puerperium, | O29.0, O29.1, O29.2, O89.0, O89.1, O89.2, O74.0, O74.1, O74.2 or O74.3                                                                                                                                                                                          |
| Surgical or manual correction of inverted uterus for vaginal births only                                             | 5.PC.91.HQ or 5.PC.91.HP, restricted to vaginal births (i.e., absence of caesarean code 5.MD.60)                                                                                                                                                                |

Table 2. Components of composite severe neonatal morbidity and associated International Classification of Diseases (ICD-10 CA), Canadian Classification of Intervention (CCI) and related codes.

| <b>Severe neonatal morbidity subtypes</b> | <b>Diagnosis (ICD-10CA), procedure (CCI) codes and other variables</b> |
|-------------------------------------------|------------------------------------------------------------------------|
| Neonatal seizure                          | P90                                                                    |
| Intubation                                | 1GZ31CAND, 1GZ31CRND                                                   |
| Congenital malformations                  | Q                                                                      |

Table 3. Variables used for restriction, adjustment and other process variables, and associated International Classification of Diseases (ICD-10 CA), Canadian Classification of Intervention (CCI) and related codes.

| <b>Maternal conditions and procedures</b>           | <b>Diagnosis (ICD-10CA), procedure (CCI) codes and other variables</b>                                    |
|-----------------------------------------------------|-----------------------------------------------------------------------------------------------------------|
| Multi-fetal pregnancy                               | O30, O31, O840, O849, O632, Z372, Z373, Z374, Z375, Z376, Z377, Z383, Z384, Z385, Z386, Z387, Z388, Z3790 |
| Previous cesarean delivery                          | O3420, O757, O6640                                                                                        |
| Pre-existing diabetes mellitus                      | E10, E11, O245, O246, O247                                                                                |
| Pre-existing hypertension                           | I10, I11, I12, I13, I15, O10, O11                                                                         |
| Gestational hypertension with/without pre-eclampsia | O13, O16                                                                                                  |
| Gestational diabetes                                | O248                                                                                                      |
| Cesarean delivery                                   | 5MD60                                                                                                     |
| Trial of labour                                     | O757, O61, O62, O63, O64, O65, O66, O67, O68, O69, 5AC30                                                  |

Table 4. Modeling tier of obstetric service without adjustment for hospital volume of delivery. Results of negative binomial regression showing the associations between tiers of obstetric service hospitals and i) composite severe maternal morbidity and maternal mortality; and ii) composite serious neonatal morbidity and neonatal mortality among women with a previous cesarean delivery and a parity of one, Canada (excluding Quebec), April 2013 to March 2019.

| Variable                                         | Unadjusted |           |         | Adjusted   |           |         |
|--------------------------------------------------|------------|-----------|---------|------------|-----------|---------|
|                                                  | Rate ratio | 95% CI    | P value | Rate ratio | 95% CI    | P value |
| Severe maternal morbidity and maternal mortality |            |           |         |            |           |         |
| Tier of service: 1                               | 0.65       | 0.50-0.84 | 0.001   | 0.69       | 0.53-0.90 | 0.006   |
| 2 (reference)                                    | 1.00       | ( - )     | -       | 1.00       | ( - )     | -       |
| 3                                                | 0.84       | 0.68-1.03 | 0.10    | 0.87       | 0.71-1.06 | 0.18    |
| 4                                                | 1.53       | 1.23-1.89 | <.0001  | 1.36       | 1.05-1.76 | <0.02   |
| VBAC (%)                                         | 1.01       | 1.00-1.02 | 0.08    | 1.00       | 0.99-1.01 | 0.69    |
| Advanced maternal age (%)                        | 1.00       | 0.99-1.01 | 0.63    | 1.00       | 0.99-1.01 | 0.77    |
| Pre-existing diabetes (%)                        | 1.26       | 1.14-1.38 | <.0001  | 1.10       | 0.99-1.22 | 0.07    |
| Gestational diabetes (%)                         | 1.01       | 0.99-1.03 | 0.29    | 0.99       | 0.97-1.01 | 0.44    |
| Hypertensive disorders (%)                       | 1.05       | 1.03-1.07 | <.0001  | 1.05       | 1.01-1.09 | 0.006   |
| Serious neonatal morbidity or neonatal death     |            |           |         |            |           |         |
| Tier of service: 1                               | 0.86       | 0.57-1.31 | 0.48    | 0.83       | 0.54-1.27 | 0.39    |
| 2 (reference)                                    | 1.00       | ( - )     | -       | 1.00       | ( - )     | -       |
| 3                                                | 1.28       | 0.93-1.77 | 0.13    | 1.38       | 1.01-1.90 | 0.05    |
| 4                                                | 1.20       | 0.85-1.71 | 0.31    | 1.01       | 0.66-1.56 | 0.96    |
| VBAC (%)                                         | 1.02       | 1.00-1.04 | 0.01    | 1.02       | 1.01-1.04 | 0.01    |
| Advanced maternal age (%)                        | 1.00       | 0.99-1.01 | 0.61    | 1.00       | 0.99-1.01 | 0.91    |
| Pre-existing diabetes (%)                        | 1.10       | 0.94-1.30 | 0.24    | 1.03       | 0.85-1.26 | 0.76    |
| Gestational diabetes (%)                         | 0.99       | 0.96-1.02 | 0.55    | 0.98       | 0.94-1.01 | 0.16    |
| Hypertensive disorders (%)                       | 1.02       | 0.97-1.08 | 0.39    | 1.03       | 0.96-1.11 | 0.35    |

Table 5. Modeling hospital volume of delivery without adjustment for tier of obstetric service. Results of Poisson regression showing the associations between tiers of obstetric service hospitals and i) composite severe maternal morbidity and maternal mortality; and ii) composite serious neonatal morbidity and neonatal mortality among women with a previous caesarean delivery and a parity of one, Canada (excluding Quebec), April 2013 to March 2019.

| Variable                                                | Unadjusted |           |         | Adjusted   |           |         |
|---------------------------------------------------------|------------|-----------|---------|------------|-----------|---------|
|                                                         | Rate ratio | 95% CI    | P value | Rate ratio | 95% CI    | P value |
| <b>Severe maternal morbidity and maternal mortality</b> |            |           |         |            |           |         |
| Delivery volume (100s)                                  | 1.02       | 0.99-1.05 | 0.29    | 1.01       | 1.00-1.02 | 0.29    |
| VBAC (%)                                                | 1.01       | 1.00-1.02 | 0.08    | 1.01       | 1.00-1.02 | 0.21    |
| Advanced maternal age (%)                               | 1.00       | 0.99-1.01 | 0.63    | 1.00       | 0.99-1.01 | 0.49    |
| Pre-existing diabetes (%)                               | 1.26       | 1.14-1.38 | <.0001  | 1.20       | 1.10-1.32 | <0.0001 |
| Gestational diabetes (%)                                | 1.01       | 0.99-1.03 | 0.29    | 0.98       | 0.96-1.01 | 0.14    |
| Hypertensive disorders (%)                              | 1.05       | 1.03-1.07 | <.0001  | 1.06       | 1.03-1.10 | <0.003  |
| <b>Serious neonatal morbidity or neonatal death</b>     |            |           |         |            |           |         |
| Delivery volume (100s)                                  | 1.02       | 1.00-1.03 | 0.05    | 1.02       | 1.00-1.04 | 0.02    |
| VBAC (%)                                                | 1.02       | 1.00-1.04 | 0.01    | 1.02       | 1.00-1.04 | 0.04    |
| Advanced maternal age (%)                               | 1.00       | 0.99-1.01 | 0.61    | 0.99       | 0.86-1.14 | 0.32    |
| Pre-existing diabetes (%)                               | 1.10       | 0.94-1.30 | 0.24    | 1.03       | 0.87-1.23 | 0.70    |
| Gestational diabetes (%)                                | 0.99       | 0.96-1.02 | 0.55    | 0.98       | 0.95-1.01 | 0.26    |
| Hypertensive disorders (%)                              | 1.02       | 0.97-1.08 | 0.39    | 1.01       | 0.95-1.08 | 0.72    |

Table 6. Number and rate (%) of hospitals with outlier rates of severe maternal morbidity/mortality among term, singleton deliveries to women with a previous cesarean delivery by tier of obstetric service and province/territories, Canada (excluding Quebec), April 2013 to March 2019. Tiers of service, which were province/territories-specific, were modified to create a common tiers of service framework for all provinces/territories.

| Province/territories | Tiers of service |                      | Number of hospitals | Outlier hospitals |         |           |         |
|----------------------|------------------|----------------------|---------------------|-------------------|---------|-----------|---------|
|                      | Common           | Province/territories |                     | Within tier       |         | Reference |         |
|                      |                  |                      |                     | Number            | Percent | Number    | Percent |
| British Columbia     | 0                | 0                    | 1                   | 0                 | 0.0     | 0         | 0.0     |
|                      | 1                | 1a                   | 3                   | 0                 | 0.0     | 0         | 0.0     |
|                      | 1                | 1b                   | 36                  | 2                 | 5.6     | 9         | 25.0    |
|                      | 2                | 2a                   | 6                   | 1                 | 16.7    | 2         | 33.3    |
|                      | 2                | 2b                   | 3                   | 0                 | 0.0     | 0         | 0.0     |
|                      | 3                | 3                    | 3                   | 1                 | 33.3    | 1         | 33.3    |
|                      | 4                | 4                    | 1                   | 1                 | 100.0   | -         | -       |
|                      | All              | All                  | 53                  | 5                 | 9.4     | 12        | 22.6    |
| Alberta              | 0                | 0                    | 3                   | 0                 | 0.0     | 0         | 0.0     |
|                      | 1                | 1                    | 6                   | 0                 | 0.0     | 0         | 0.0     |
|                      | 2                | 2                    | 30                  | 2                 | 6.7     | 8         | 26.7    |
|                      | 3                | 3                    | 8                   | 1                 | 12.5    | 3         | 37.5    |
|                      | 4                | 4                    | 5                   | 2                 | 40.0    | 1         | 20.0    |
|                      | All              | All                  | 52                  | 5                 | 9.6     | 12        | 23.1    |
| Saskatchewan         | 0                | 0                    | 1                   | 0                 | 0.0     | 0         | 0.0     |
|                      | 1                | 1                    | 5                   | 0                 | 0.0     | 0         | 0.0     |
|                      | 2                | 2                    | 8                   | 2                 | 25.0    | 2         | 25.0    |
|                      | 4                | 4                    | 2                   | 0                 | 0.0     | 0         | 0.0     |
|                      | All              | All                  | 16                  | 2                 | 12.5    | 2         | 12.5    |
| Manitoba             | 0                | 0                    | 2                   | 0                 | 0.0     | 0         | 0.0     |
|                      | 1                | 1                    | 0                   | 0                 | -       | 0         | -       |
|                      | 2                | 2                    | 12                  | 1                 | 8.3     | 2         | 16.7    |
|                      | 4                | 3                    | 2                   | 0                 | 0.0     | 0         | 0.0     |
|                      | All              | All                  | 16                  | 1                 | 6.3     | 2         | 12.5    |
| Ontario              | 0                | 0                    | 3                   | 0                 | 0.0     | 0         | 0.0     |
|                      | 1                | 1a                   | 12                  | 0                 | 0.0     | 0         | 0.0     |
|                      | 1                | 1b                   | 33                  | 2                 | 6.1     | 8         | 24.2    |
|                      | 2                | 2a                   | 10                  | 1                 | 10.0    | 2         | 20.0    |
|                      | 2                | 2b                   | 21                  | 2                 | 9.5     | 4         | 19.0    |
|                      | 3                | 2c                   | 17                  | 3                 | 17.6    | 7         | 41.2    |
|                      | 4                | 3                    | 8                   | 2                 | 25.0    | 1         | 12.5    |
|                      | All              | All                  | 104                 | 10                | 9.6     | 22        | 21.2    |

Table 6 (cont). Number and rate (%) of hospitals with outlier rates of severe maternal morbidity/mortality among term, singleton deliveries to women with a previous cesarean delivery by tier of service and province/territories, Canada (excluding Quebec), April 2013 to March 2019. Tiers of service, which were province/territories-specific, were modified to create a common tiers of service framework for all provinces/territories.

| Province/territories      | Tier of service |                      | Number of hospitals | Outlier hospitals |         |           |         |
|---------------------------|-----------------|----------------------|---------------------|-------------------|---------|-----------|---------|
|                           | Common          | Province/territories |                     | Within tier       |         | Reference |         |
|                           |                 |                      |                     | Number            | Percent | Number    | Percent |
| New Brunswick             | 0               | 0                    | 0                   | 0                 | -       | 0         | -       |
|                           | 1               | 1                    | 1                   | 0                 | 0.0     | 0         | 0.0     |
|                           | 2               | 2a                   | 4                   | 0                 | 0.0     | 1         | 25.0    |
|                           | 2               | 2b                   | 1                   | 0                 | 0.0     | 0         | 0.0     |
|                           | 3               | 3                    | 3                   | 0                 | 0.0     | 1         | 33.3    |
|                           | All             | All                  | 9                   | 0                 | 0.0     | 2         | 22.2    |
| Nova Scotia               | 0               | 0                    | 1                   | 0                 | 0.0     | 0         | 0.0     |
|                           | 2               | 2a                   | 5                   | 0                 | 0.0     | 1         | 20.0    |
|                           | 2               | 2b                   | 3                   | 0                 | 0.0     | 1         | 33.3    |
|                           | 4               | 3                    | 1                   | 0                 | 0.0     | -         | -       |
|                           | All             | All                  | 10                  | 0                 | 0.0     | 2         | 20.0    |
| Prince Edward             | 2               | 2                    | 1                   | 0                 | 0.0     | -         | -       |
|                           | 2               | 2.5                  | 1                   | 0                 | 0.0     | -         | -       |
|                           | All             | All                  | 2                   | 0                 | 0.0     | -         | -       |
| Newfoundland and Labrador | 1               | 1                    | 0                   | 0                 | 0.0     | 0         | 0       |
|                           | 2               | 2                    | 9                   | 0                 | 0.0     | 2         | 22.2    |
|                           | 3               | 3                    | 1                   | 0                 | 0.0     | -         | -       |
|                           | 4               | 4                    | 1                   | 0                 | 0.0     | -         | -       |
|                           | All             | All                  | 11                  | 0                 | 0.0     | 2         | 11.1    |
| Combined                  | 0               | 0                    | 0                   | 0                 | -       | 0         | -       |
|                           | 1               | 1                    | 1                   | 0                 | 0.0     | 0         | 0.0     |
|                           | 2               | 2                    | 4                   | 1                 | 25.0    | 1         | 25.0    |
|                           | All             | All                  | 5                   | 1                 | 20.0    | 1         | 20.0    |
| Canada (excluding Quebec) | All             | All                  | 278                 | 24                | 8.6     | 57        | 20.5    |



Table 7. Number and rate (%) of hospitals with outlier rates of severe maternal morbidity/mortality among term, singleton deliveries to women with a previous cesarean delivery by modified tier of service, Canada (excluding Quebec), April 2013 to March 2019.

| Tier of service | Number of hospitals | Outliers hospitals     |         |             |                      |         |             |
|-----------------|---------------------|------------------------|---------|-------------|----------------------|---------|-------------|
|                 |                     | Within-tier comparison |         |             | Reference comparison |         |             |
|                 |                     | Number                 | Percent | P for trend | Number               | Percent | P for trend |
| 0               | 11                  | 0                      | 0.0     | -           | 0                    | -       | -           |
| 1               | 97                  | 4                      | 4.1     | -           | 17                   | 17.5    | -           |
| 2               | 115                 | 10                     | 8.7     | -           | 25                   | 21.7    | -           |
| 3               | 35                  | 5                      | 14.3    | -           | 13                   | 37.1    | -           |
| 4               | 20                  | 5                      | 25.0    | -           | 2                    | 10.0    | -           |
| All             | 278                 | 24                     | 8.6     | 0.0009      | 57                   | 20.5    | 0.43        |

Table 8. Number and rate (%) of hospitals with outlier rates of serious neonatal morbidity/mortality among term, singleton deliveries to women with a previous cesarean delivery by tier of service and province/territories, Canada (excluding Quebec), April 2013 to March 2019.

| Province/territories | Tiers of service |                      | Number of hospitals | Outlier hospitals |         |           |         |
|----------------------|------------------|----------------------|---------------------|-------------------|---------|-----------|---------|
|                      | Common           | Province/territories |                     | Within tier       |         | Reference |         |
|                      |                  |                      |                     | Number            | Percent | Number    | Percent |
| British Columbia     | 0                | 0                    | 1                   | 0                 | 0.0     | 0         | 0.0     |
|                      | 1                | 1a                   | 3                   | 0                 | 0.0     | 0         | 0.0     |
|                      | 1                | 1b                   | 36                  | 1                 | 2.8     | 7         | 19.4    |
|                      | 2                | 2a                   | 6                   | 0                 | 0.0     | 1         | 16.7    |
|                      | 2                | 2b                   | 3                   | 0                 | 0.0     | 1         | 33.3    |
|                      | 3                | 3                    | 3                   | 1                 | 33.3    | 1         | 33.3    |
|                      | 4                | 4                    | 1                   | 0                 | 0.0     | 0         | -       |
|                      | All              | All                  | 53                  | 2                 | 3.8     | 10        | 18.9    |
| Alberta              | 0                | 0                    | 3                   | 0                 | 0.0     | 0         | 0.0     |
|                      | 1                | 1                    | 6                   | 0                 | 0.0     | 0         | 0.0     |
|                      | 2                | 2                    | 30                  | 1                 | 3.3     | 6         | 20.0    |
|                      | 3                | 3                    | 8                   | 1                 | 12.5    | 2         | 25.0    |
|                      | 4                | 4                    | 5                   | 0                 | 0.0     | 1         | 20.0    |
|                      | All              | All                  | 52                  | 2                 | 3.8     | 9         | 17.3    |
| Saskatchewan         | 0                | 0                    | 1                   | 0                 | 0.0     | 0         | 0.0     |
|                      | 1                | 1                    | 5                   | 0                 | 0.0     | 1         | 20.0    |
|                      | 2                | 2                    | 8                   | 1                 | 12.5    | 1         | 12.5    |
|                      | 4                | 4                    | 2                   | 0                 | 0.0     | 0         | 0.0     |
|                      | All              | All                  | 16                  | 1                 | 6.3     | 2         | 12.5    |
| Manitoba             | 0                | 0                    | 2                   | 0                 | 0.0     | 0         | 0.0     |
|                      | 1                | 1                    | 0                   | 0                 | -       | 0         | -       |
|                      | 2                | 2                    | 12                  | 1                 | 8.3     | 1         | 8.3     |
|                      | 4                | 3                    | 2                   | 1                 | 50.0    | 1         | 50.0    |
|                      | All              | All                  | 16                  | 2                 | 12.5    | 2         | 12.5    |
| Ontario              | 0                | 0                    | 3                   | 0                 | 0.0     | 0         | 0.0     |
|                      | 1                | 1a                   | 12                  | 0                 | 0.0     | 0         | 0.0     |
|                      | 1                | 1b                   | 33                  | 1                 | 3.0     | 10        | 30.3    |
|                      | 2                | 2a                   | 10                  | 2                 | 20.0    | 2         | 20.0    |
|                      | 2                | 2b                   | 21                  | 1                 | 4.8     | 6         | 28.6    |
|                      | 3                | 2c                   | 17                  | 1                 | 5.9     | 5         | 29.4    |
|                      | 4                | 3                    | 8                   | 0                 | 0.0     | 3         | 37.5    |
|                      | All              | All                  | 104                 | 5                 | 4.8     | 26        | 25.0    |

Table 8 (cont). Number and rate (%) of hospitals with outlier rates of serious neonatal morbidity/mortality among term, singleton deliveries to women with a previous cesarean delivery by tier of service and province/territories, Canada (excluding Quebec), April 2013 to March 2019.

| Province/territories      | Tier of service |                      | Number of hospitals | Outlier hospitals |         |           |         |
|---------------------------|-----------------|----------------------|---------------------|-------------------|---------|-----------|---------|
|                           | Common          | Province/territories |                     | Within tier       |         | Reference |         |
|                           |                 |                      |                     | Number            | Percent | Number    | Percent |
| New Brunswick             | 0               | 0                    | 0                   | 0                 | -       | 0         | -       |
|                           | 1               | 1                    | 1                   | 0                 | 0.0     | 0         | 0.0     |
|                           | 2               | 2a                   | 4                   | 1                 | 25.0    | 1         | 25.0    |
|                           | 2               | 2b                   | 1                   | 0                 | 0.0     | 0         | 0.0     |
|                           | 3               | 3                    | 3                   | 0                 | 0.0     | 1         | 33.3    |
|                           | All             | All                  | 9                   | 1                 | 11.1    | 2         | 22.2    |
| Nova Scotia               | 0               | 0                    | 1                   | 0                 | 0.0     | 0         | 0.0     |
|                           | 2               | 2a                   | 5                   | 0                 | 0.0     | 1         | 20.0    |
|                           | 2               | 2b                   | 3                   | 1                 | 33.3    | 1         | 33.3    |
|                           | 4               | 3                    | 1                   | 0                 | 0.0     | -         | -       |
|                           | All             | All                  | 10                  | 1                 | 10.0    | 2         | 20.0    |
| Prince Edward             | 2               | 2                    | 1                   | -                 | -       | -         | -       |
|                           | 2               | 2.5                  | 1                   | -                 | -       | -         | -       |
|                           | All             | All                  | 2                   | 0                 | 0.0     | 0         | 0.0     |
| Newfoundland and Labrador | 1               | 1                    | 0                   | 0                 | 0.0     | 0         | 0.0     |
|                           | 2               | 2                    | 9                   | 0                 | 0.0     | 2         | 22.2    |
|                           | 3               | 3                    | 1                   | 0                 | 0.0     | -         | -       |
|                           | 4               | 4                    | 1                   | 0                 | 0.0     | -         | -       |
|                           | All             | All                  | 11                  | 0                 | 0.0     | 2         | 11.1    |
| Combined                  | 0               | 0                    | 0                   | 0                 | -       | 0         | -       |
|                           | 1               | 1                    | 1                   | 0                 | 0.0     | 0         | 0.0     |
|                           | 2               | 2                    | 4                   | 0                 | 0.0     | 1         | 25.0    |
|                           | All             | All                  | 5                   | 0                 | 0.0     | 1         | 20.0    |
| Canada (excluding Quebec) | All             | All                  | 278                 | 14                | 5.0     | 56        | 20.1    |

Table 9. Number and rate (%) of hospitals with outlier rates of serious neonatal morbidity/mortality among term, singleton deliveries to women with a previous cesarean delivery by modified tier of service, Canada (excluding Quebec), April 2013 to March 2019.

| Tier of service | Number of hospitals | Outliers hospitals     |         |             |                      |         |             |
|-----------------|---------------------|------------------------|---------|-------------|----------------------|---------|-------------|
|                 |                     | Within-tier comparison |         |             | Reference comparison |         |             |
|                 |                     | Number                 | Percent | P for trend | Number               | Percent | P for trend |
| 0               | 11                  | 0                      | 0.0     | -           | 0                    | 0.0     | -           |
| 1               | 97                  | 2                      | 2.1     | -           | 18                   | 18.6    | -           |
| 2               | 115                 | 7                      | 6.1     | -           | 23                   | 20.0    | -           |
| 3               | 35                  | 4                      | 11.4    | -           | 10                   | 28.6    | -           |
| 4               | 20                  | 1                      | 5.0     | -           | 5                    | 25.0    | -           |
| All             | 278                 | 14                     | 5.0     | 0.07        | 56                   | 20.1    | 0.26        |

Figure 1. SMM and NMM rates among women with a parity of one by tiers of service, Canada (excluding Quebec).

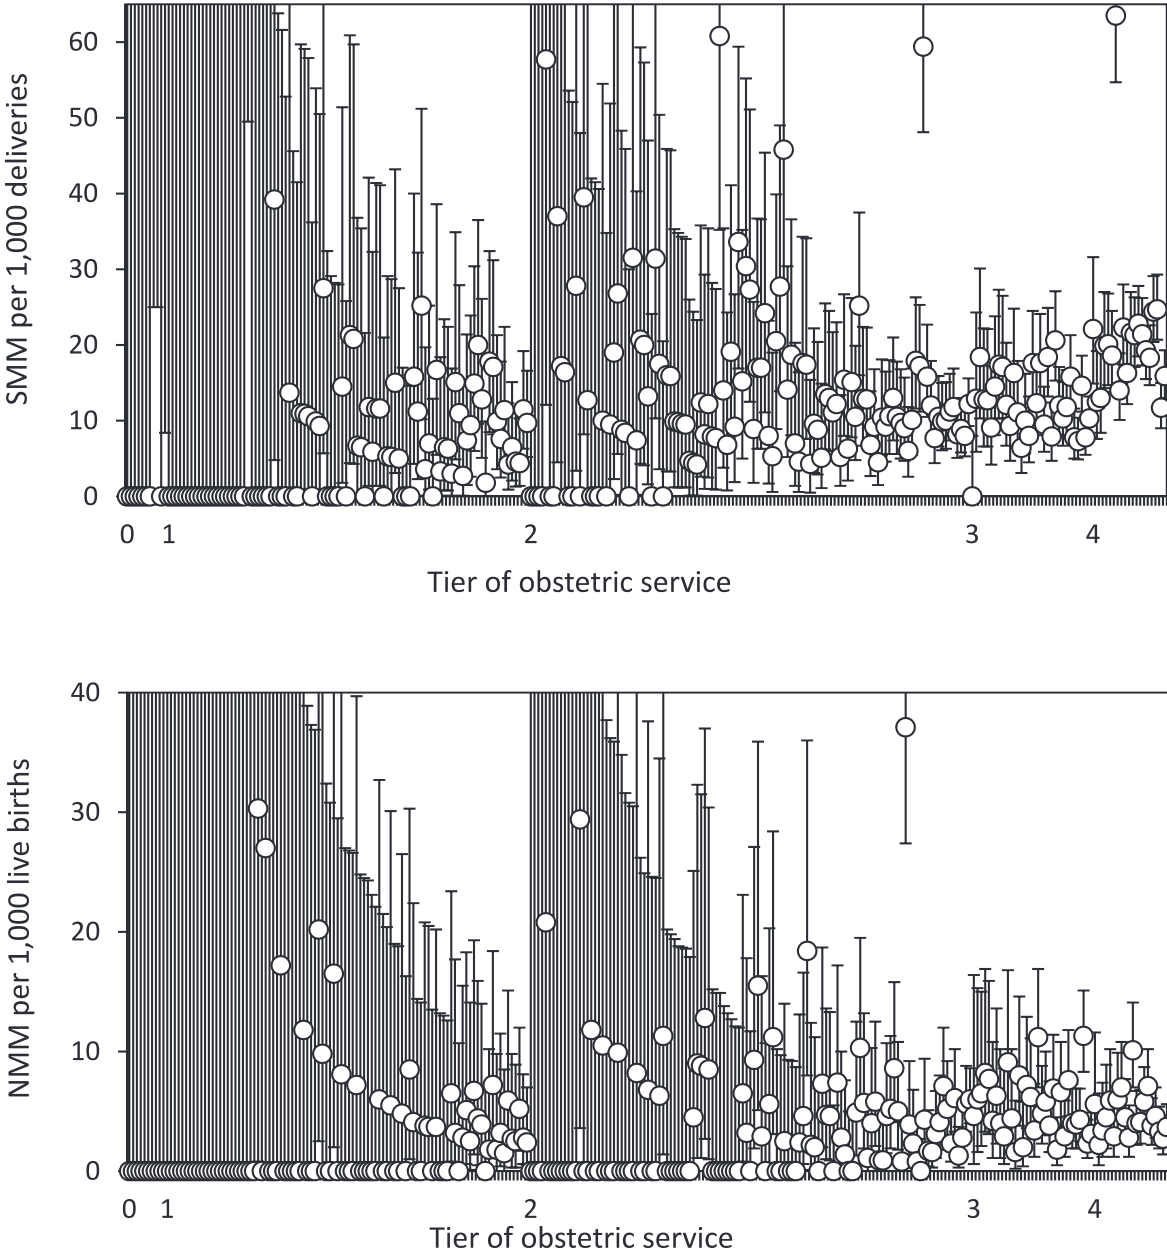

Figure 2. SMM and NMM rates among women with a parity of one by hospital delivery volume, Canada excluding Quebec).

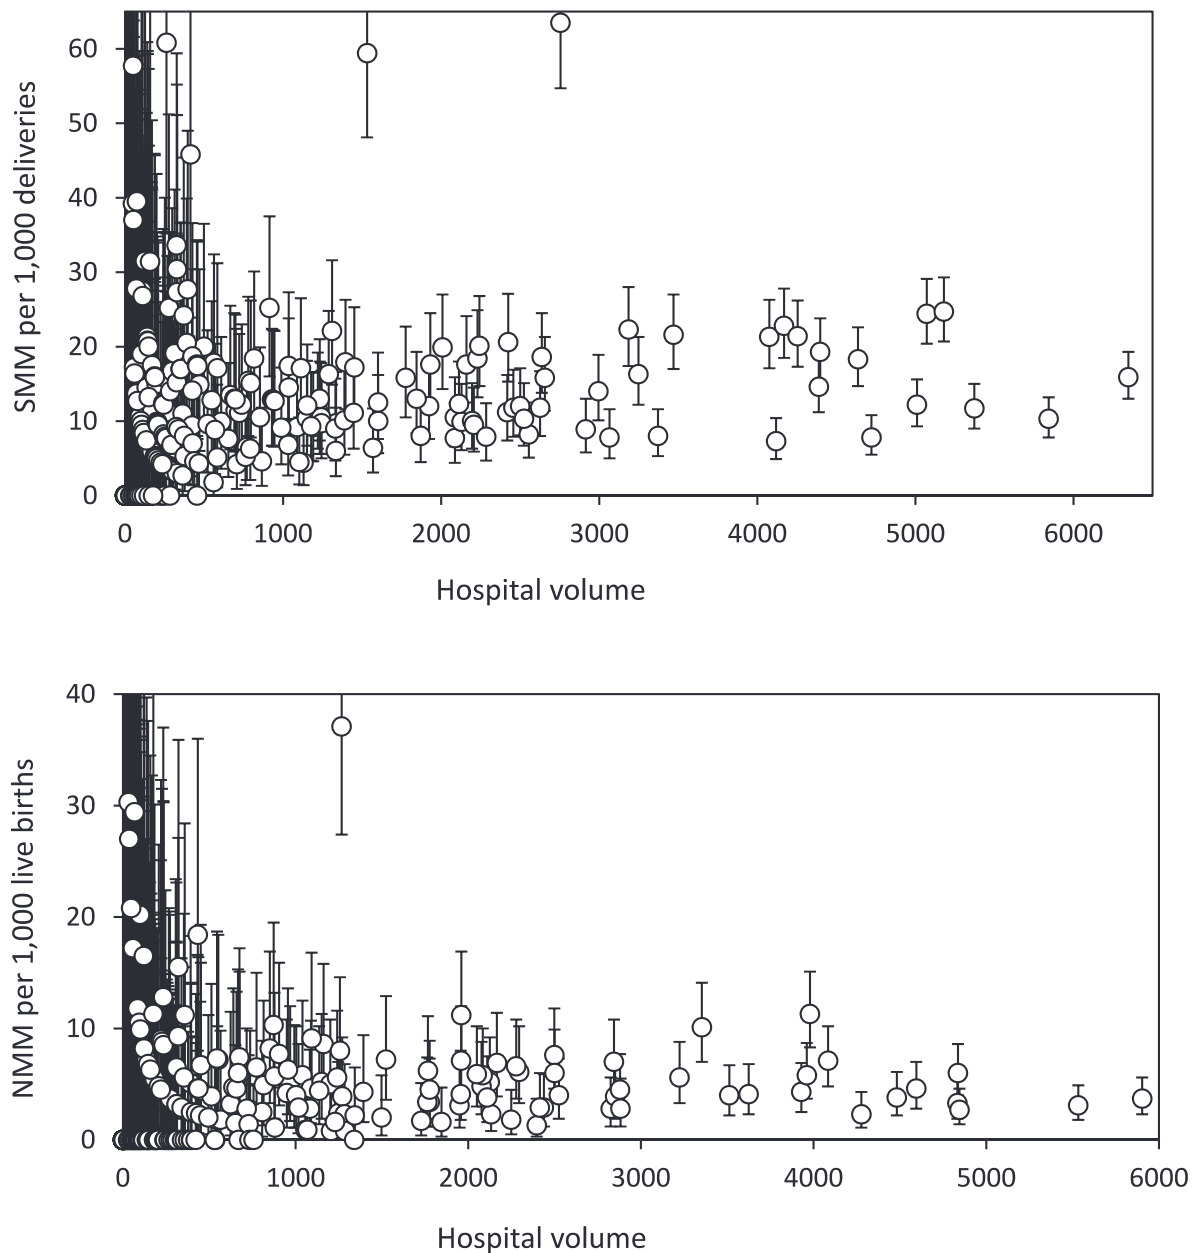

Figure 3. SMM and NMM rates by tiers of service, British Columbia.

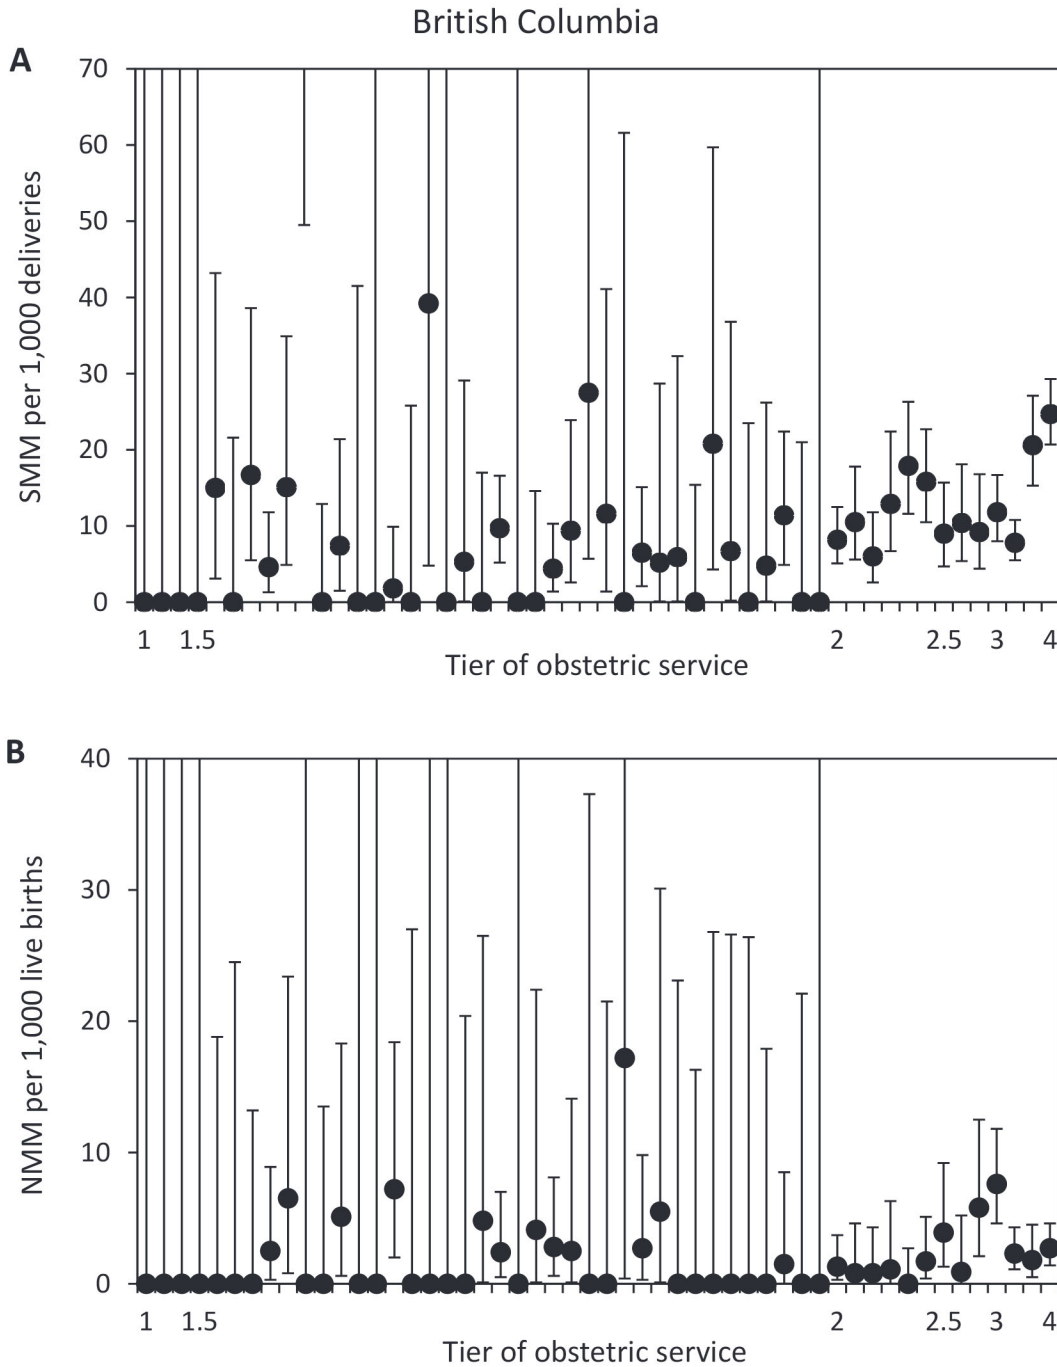

Figure 4. SMM and NMM rates by tiers of service, Alberta.

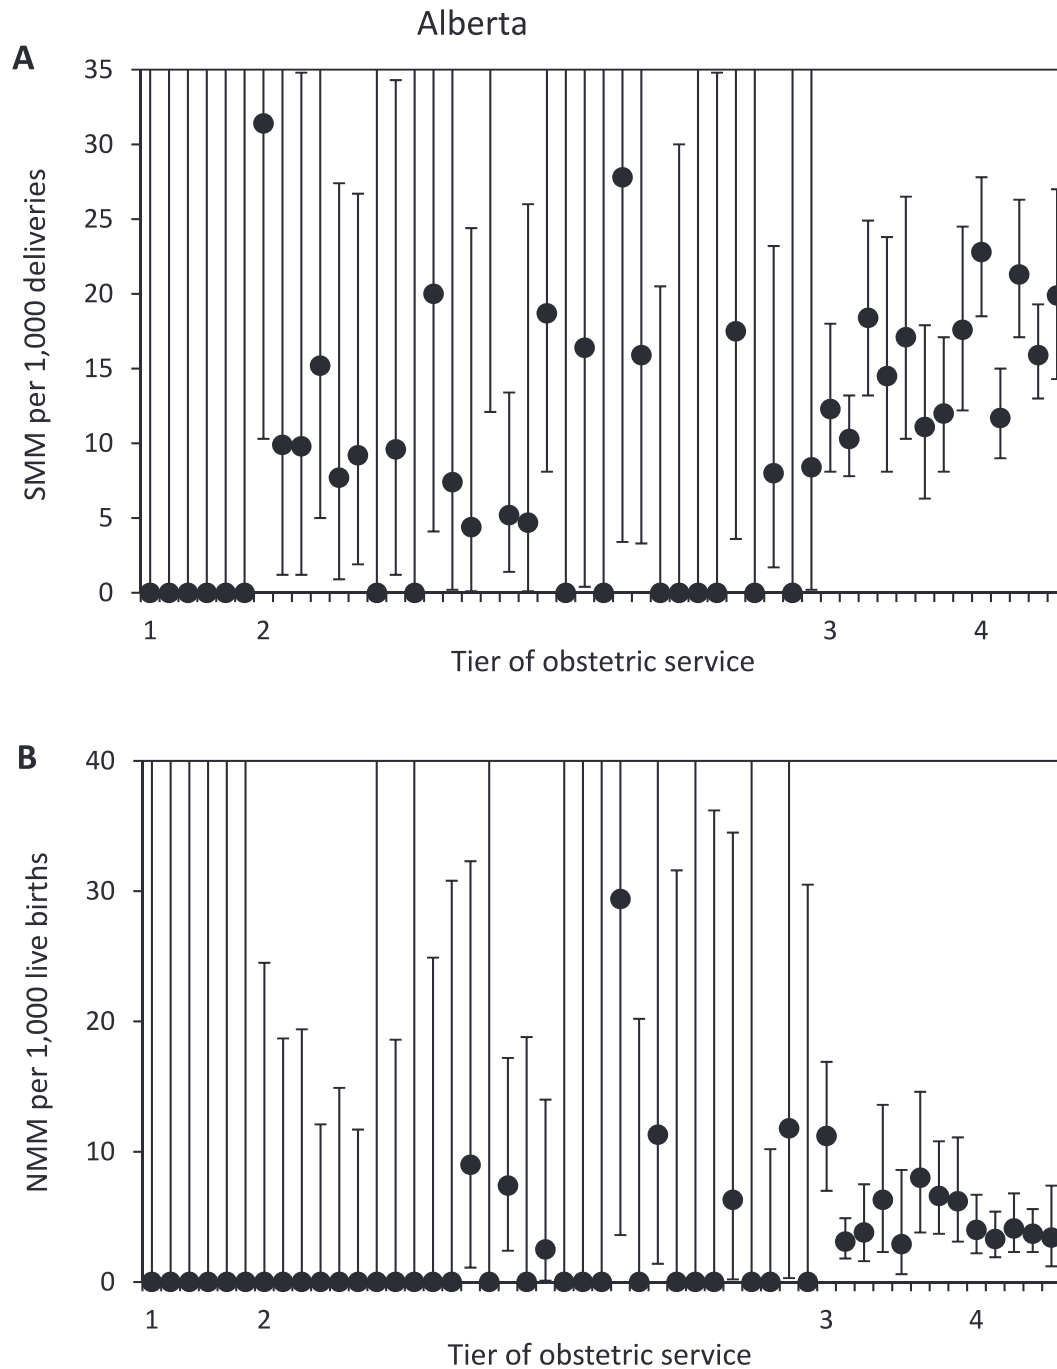



Figure 5. SMM and NMM rates by tiers of service, Saskatchewan.

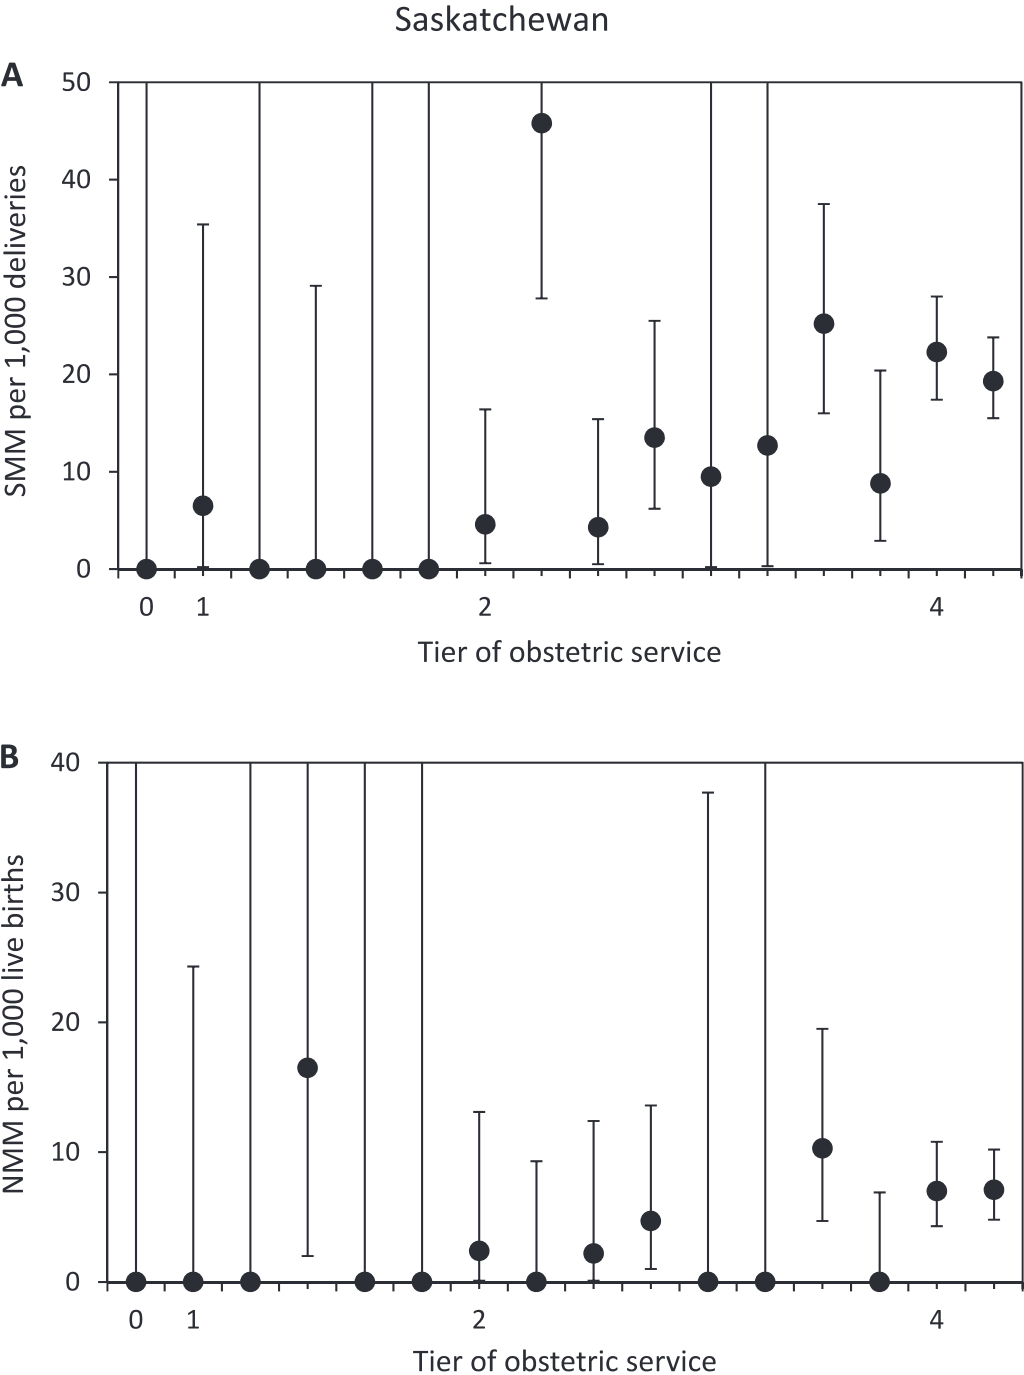

Figure 6. SMM and NMM rates by tiers of service, Manitoba.

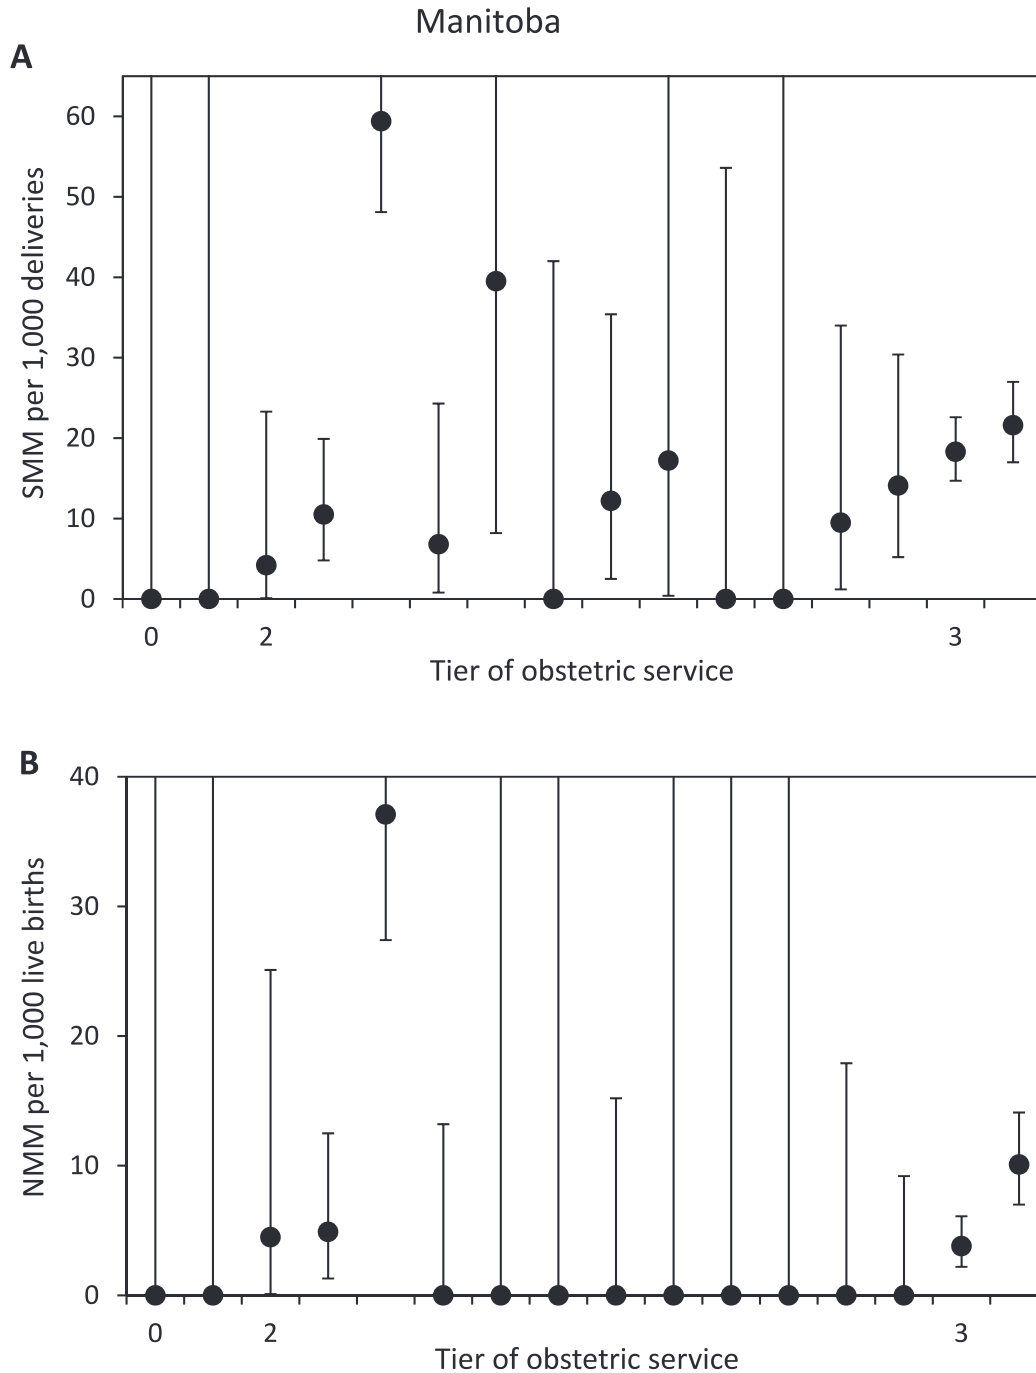

Figure 7. SMM and NMM rates by tiers of service, Ontario.

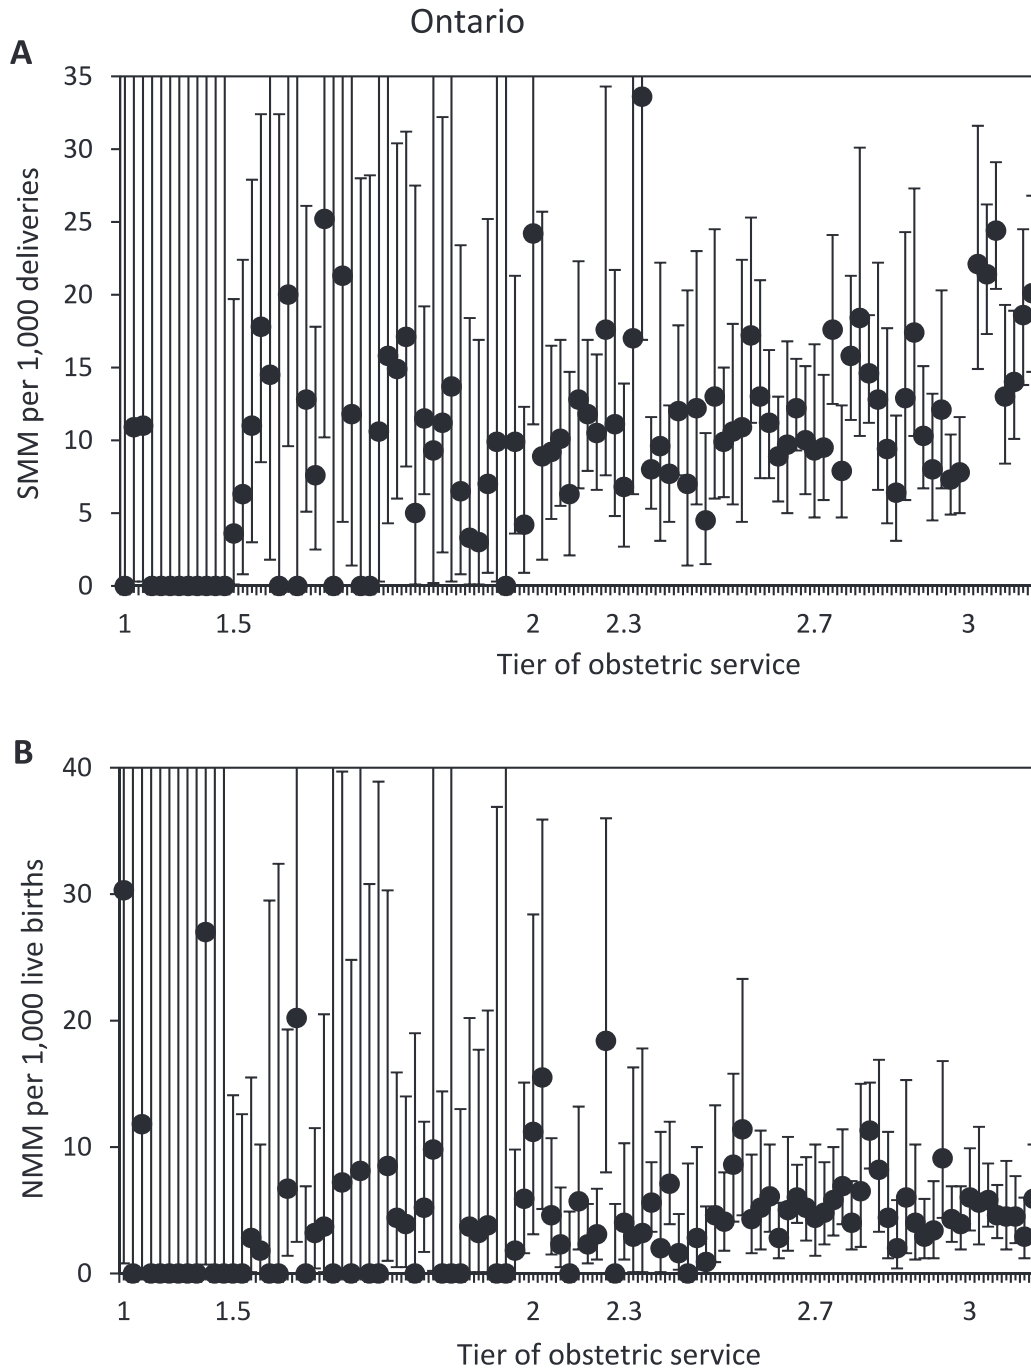

Figure 8. SMM and NMM rates by tiers of service, New Brunswick.

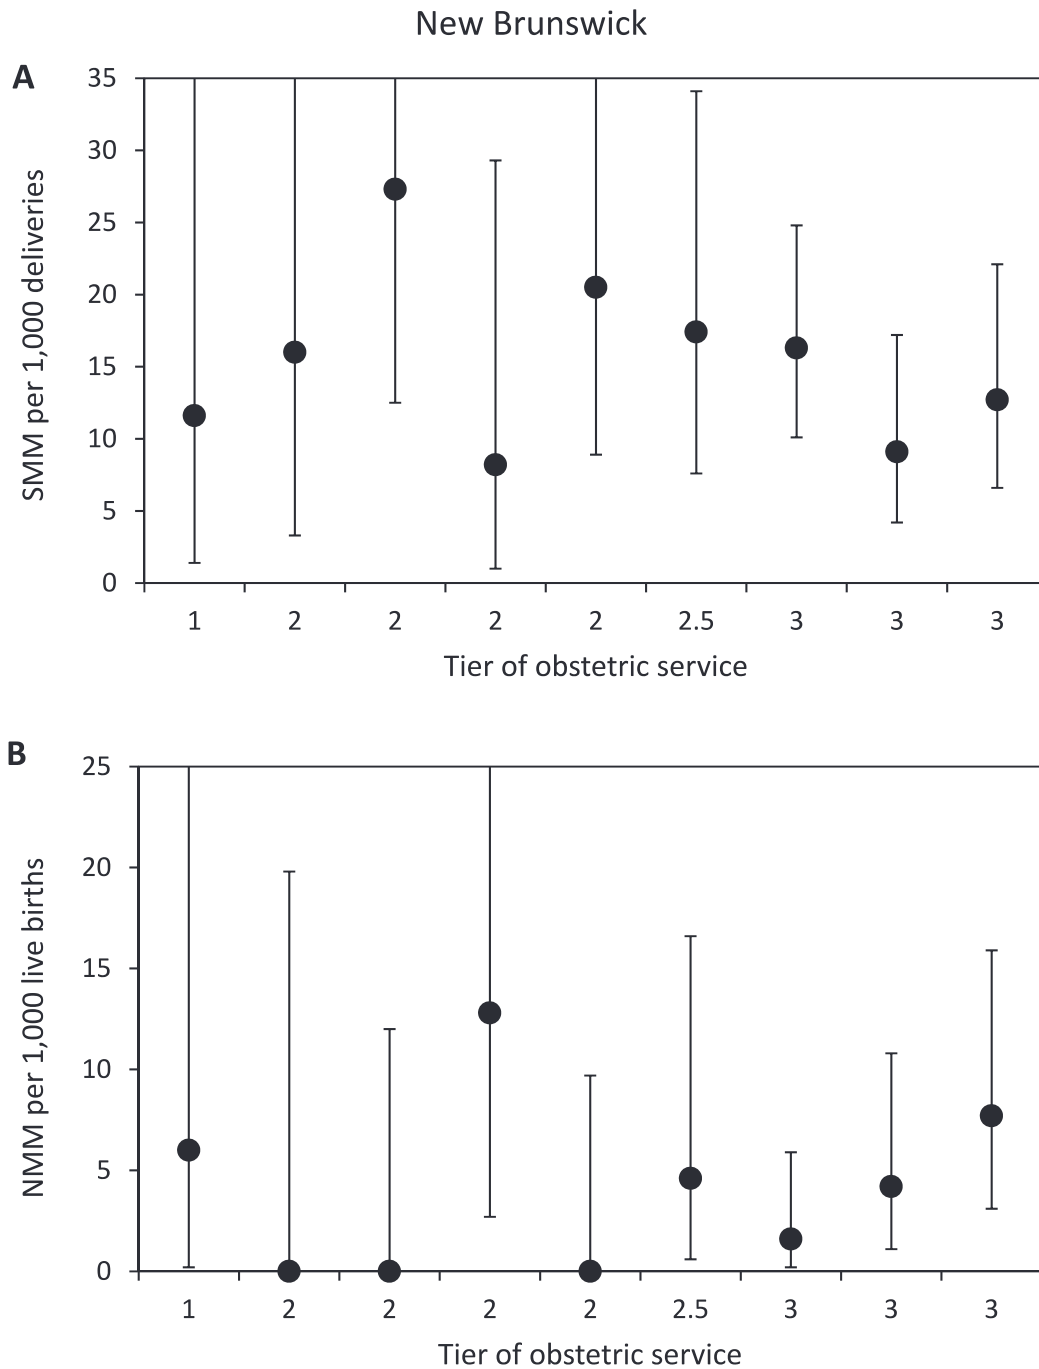

Figure 9. SMM and NMM rates by tiers of service, Nova Scotia.

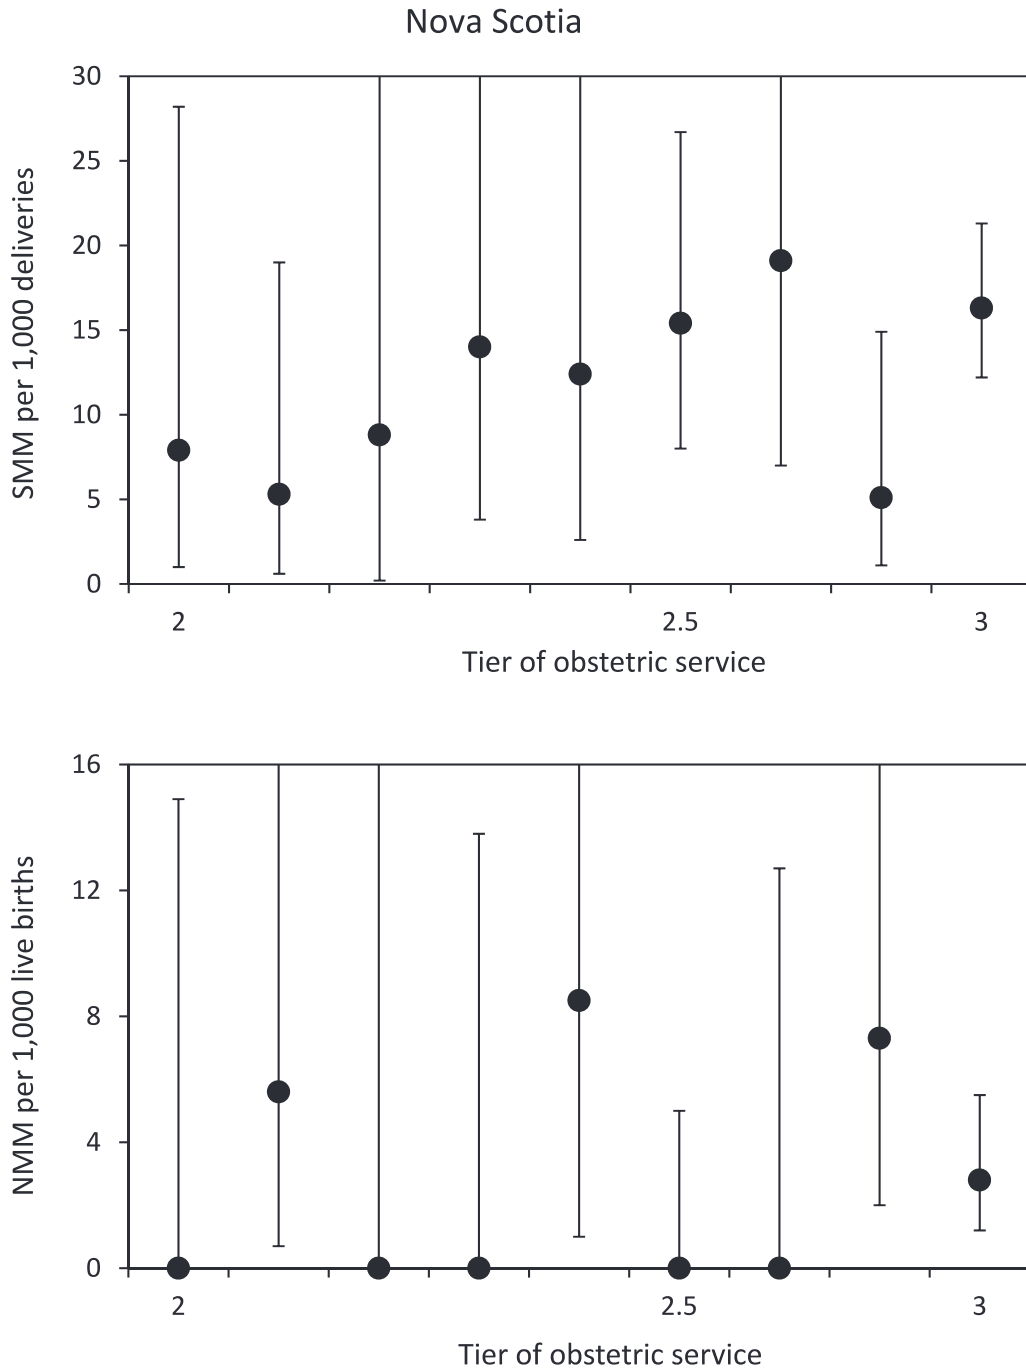

Figure 10. SMM and NMM rates by tiers of service, Prince Edward Island.

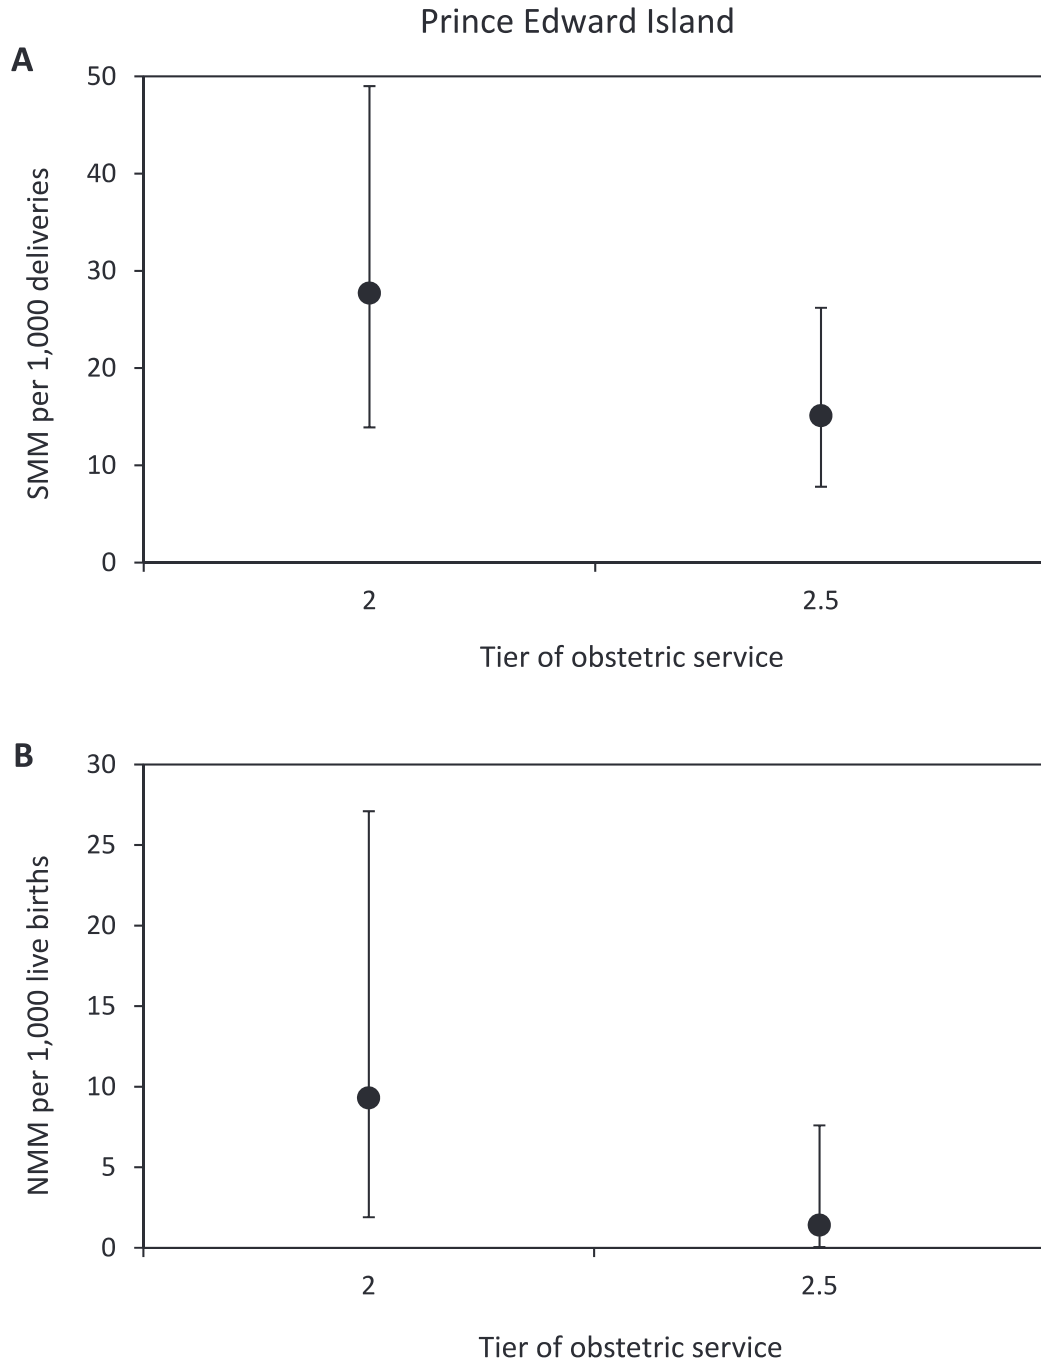

Figure 11. SMM and NMM rates by tiers of service, Newfoundland & Labrador.

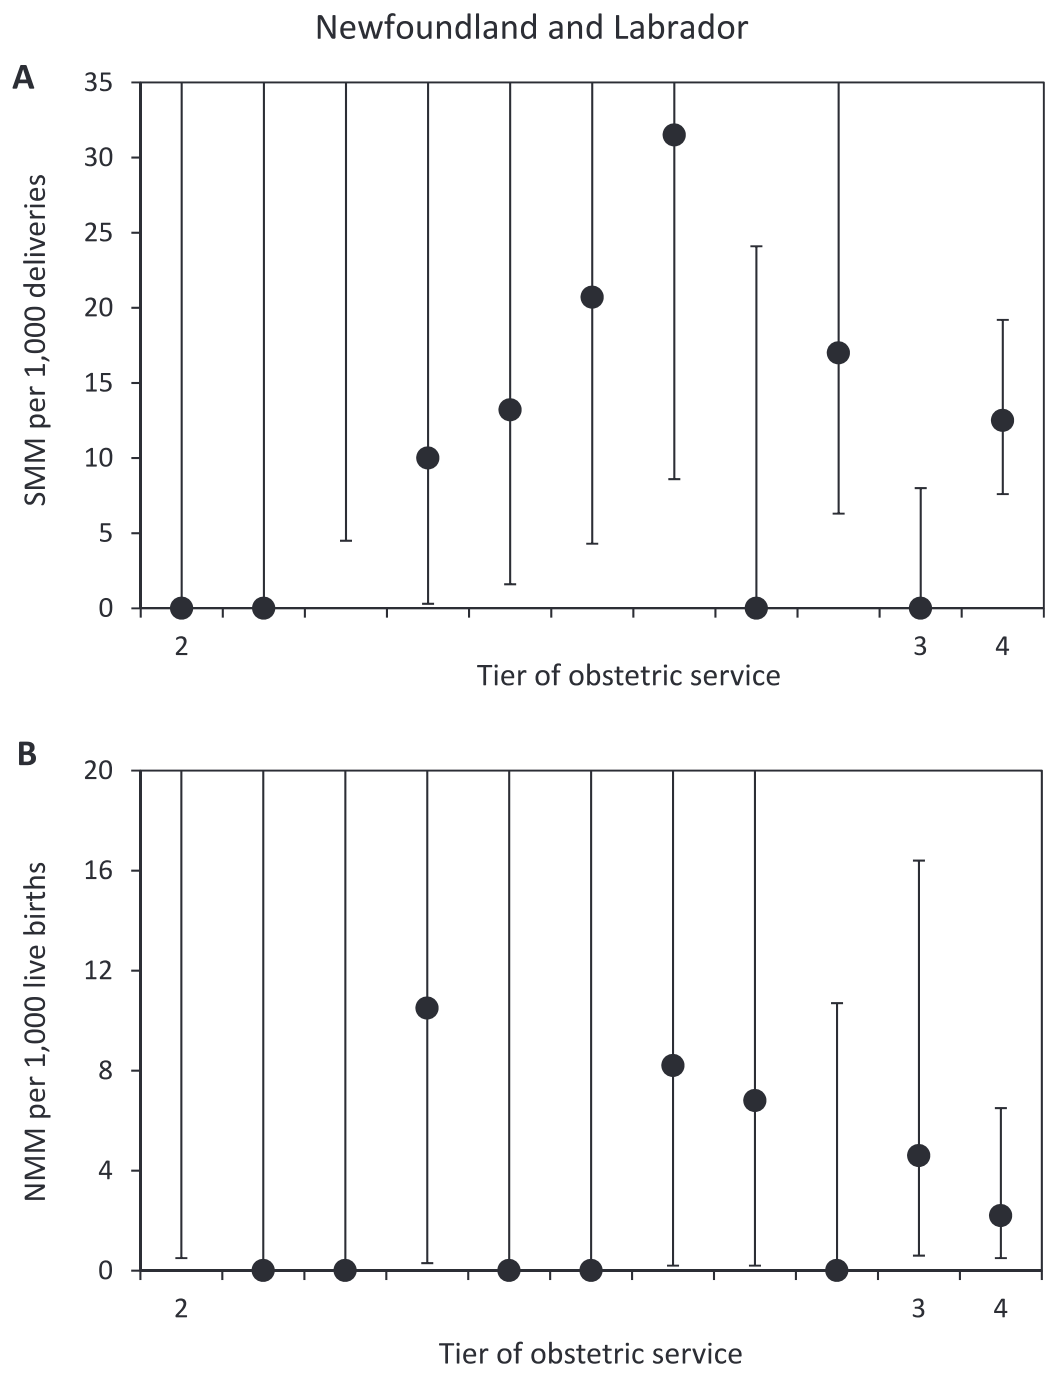

Figure 12. SMM and NMM rates by tiers of service, Combined Territories.

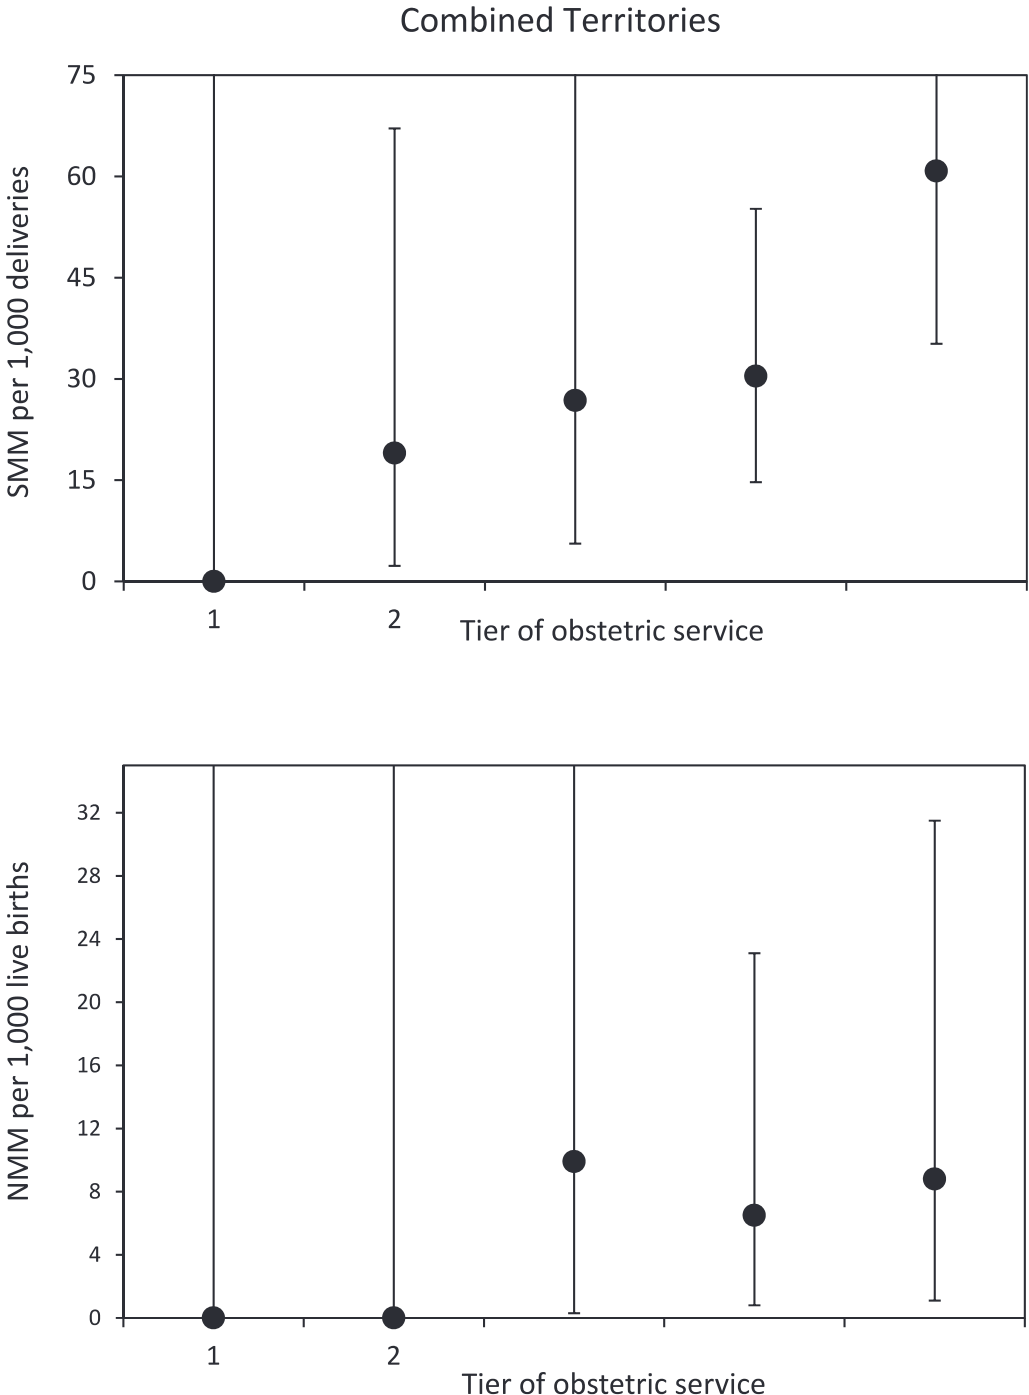



Figure 13. SMM and NMM rates by hospital volume, British Columbia.

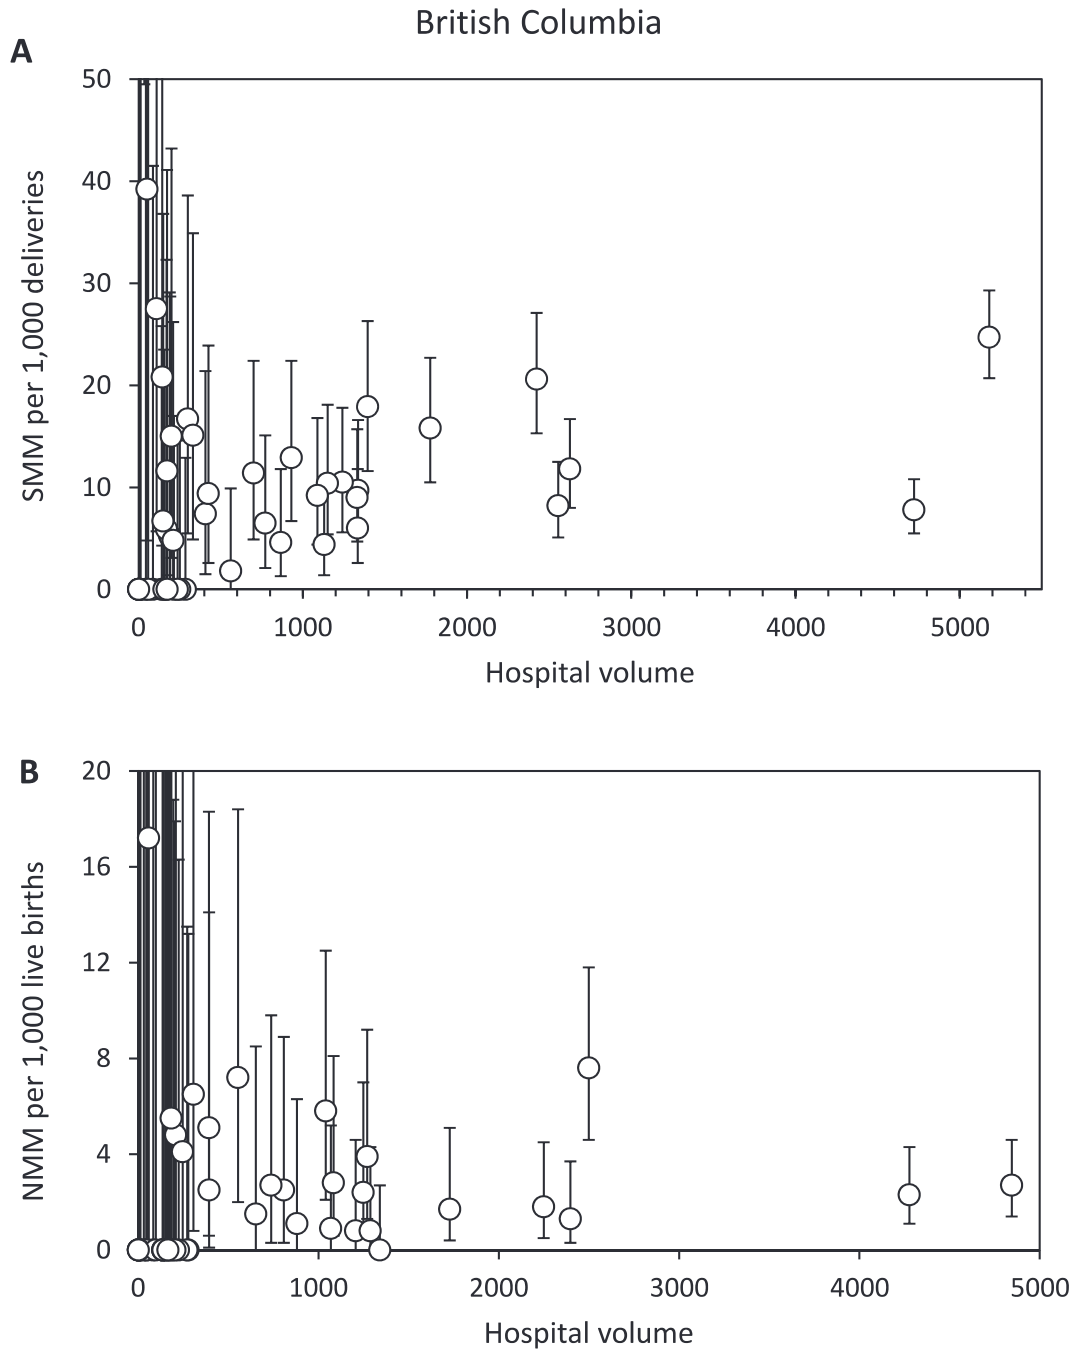

Figure 14. SMM and NMM rates by hospital volume, Alberta.

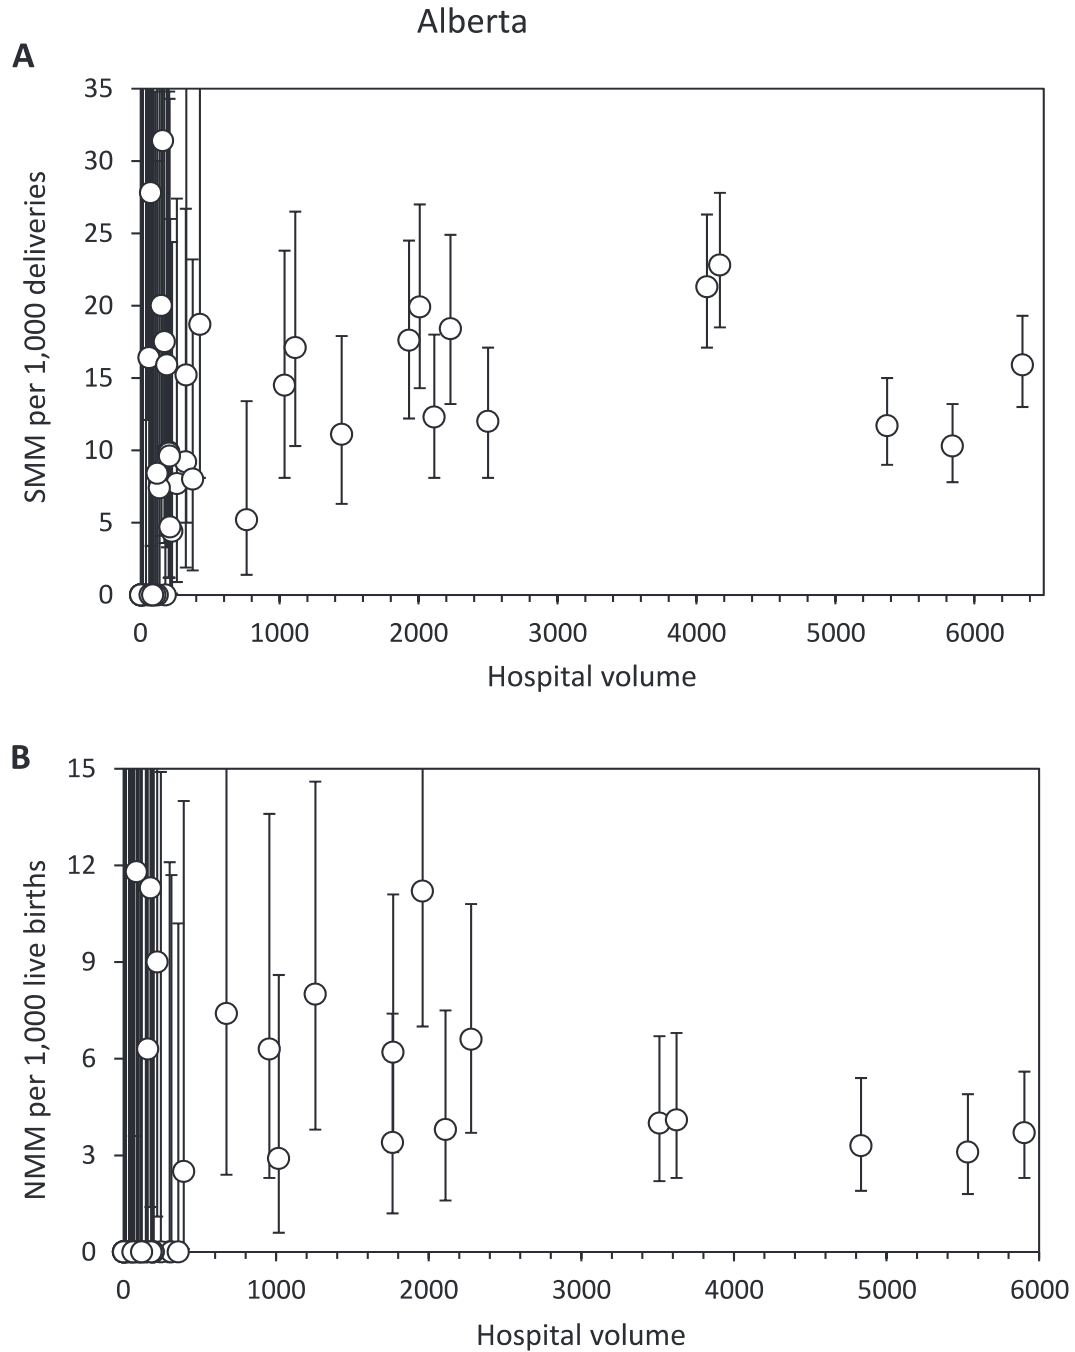

Figure 15. SMM and NMM rates by hospital volume, Saskatchewan.

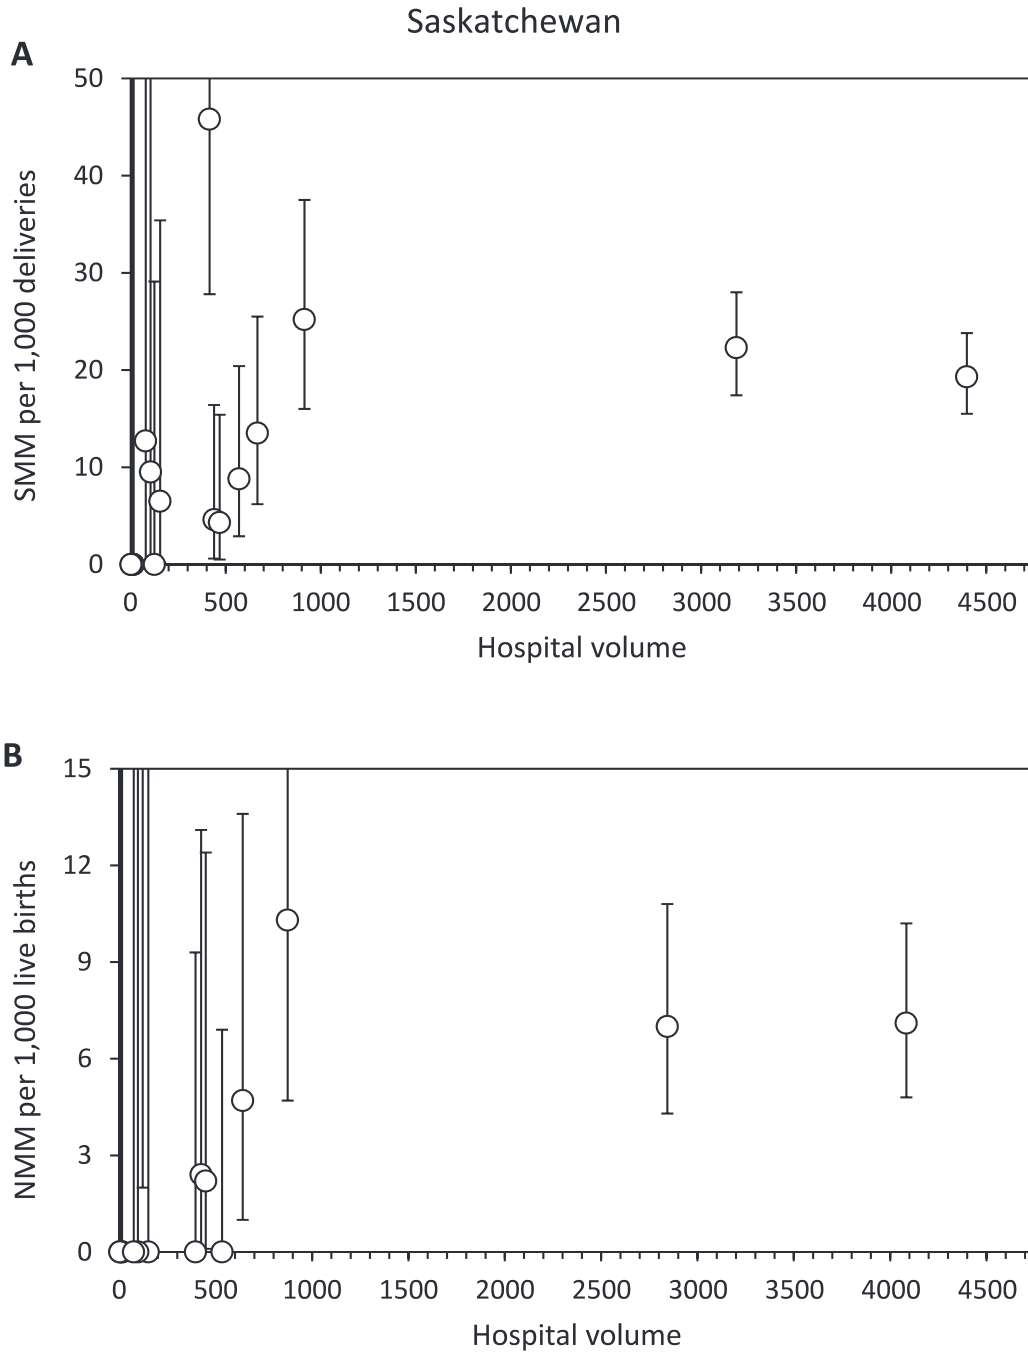

Figure 16. SMM and NMM rates by hospital volume, Manitoba.

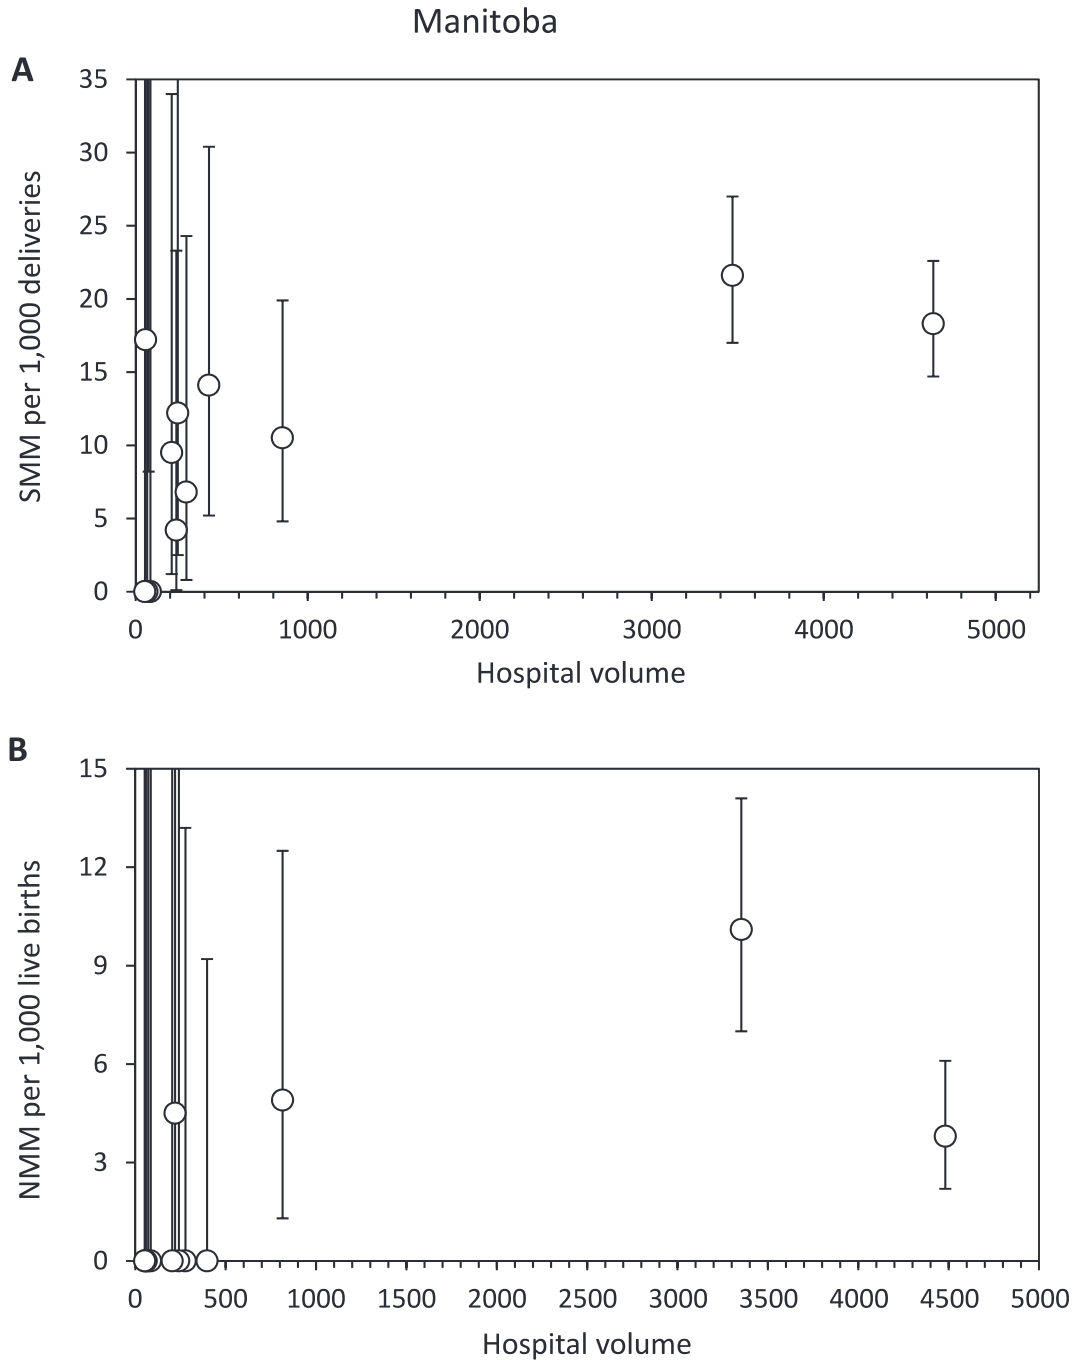

Figure 17. SMM and NMM rates by hospital volume, Ontario.

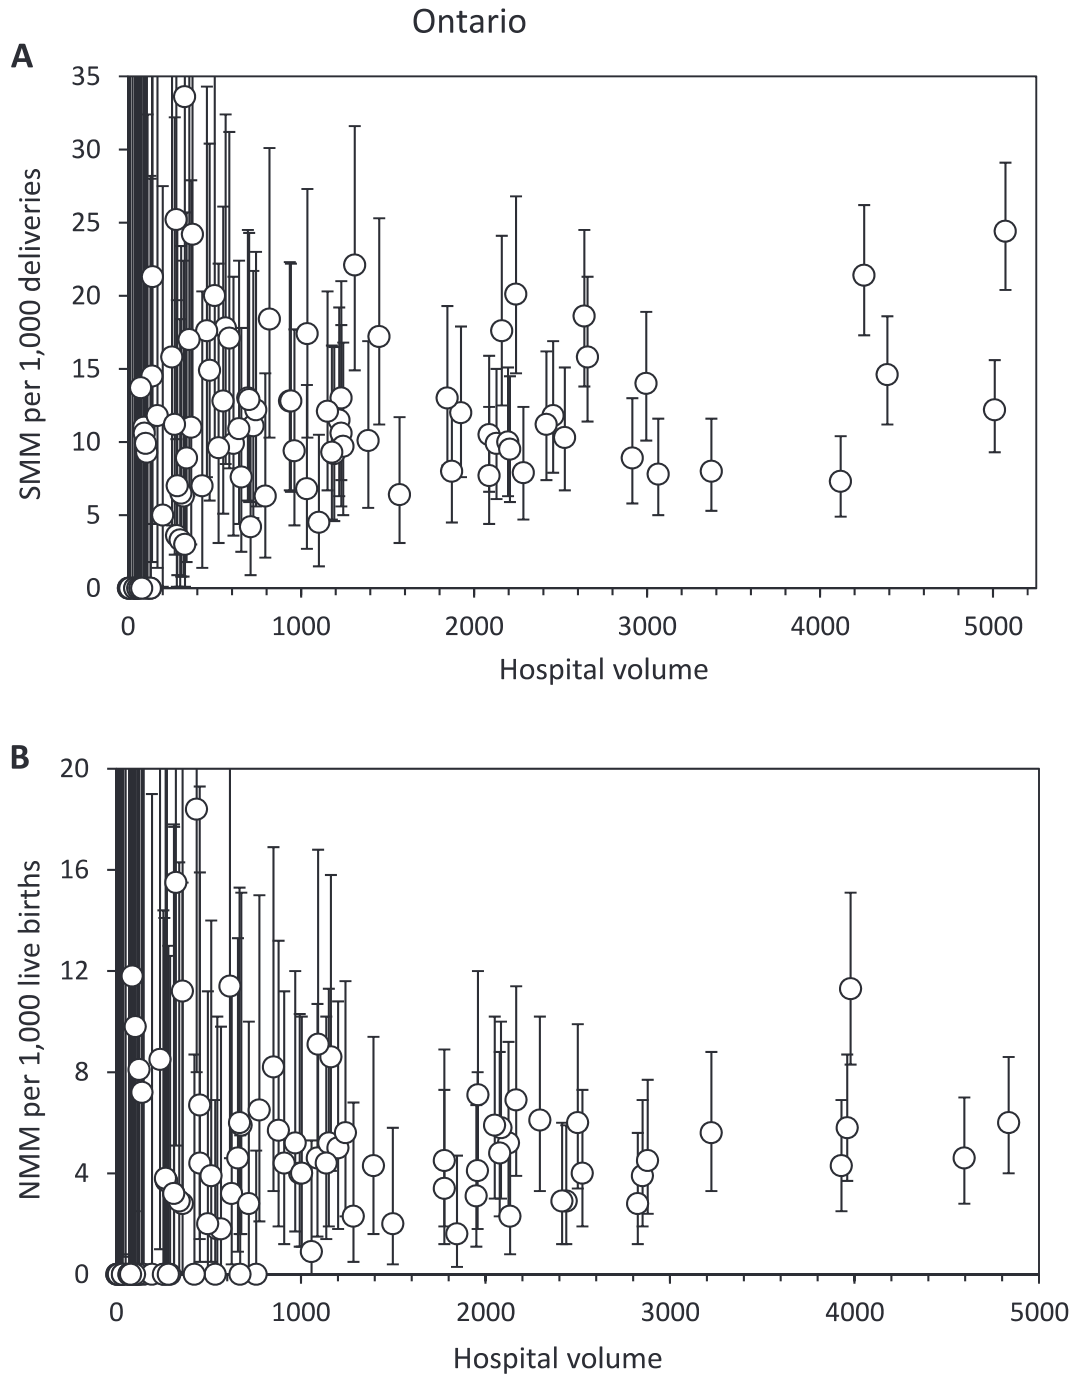

Figure 18. SMM and NMM rates by hospital volume, New Brunswick.

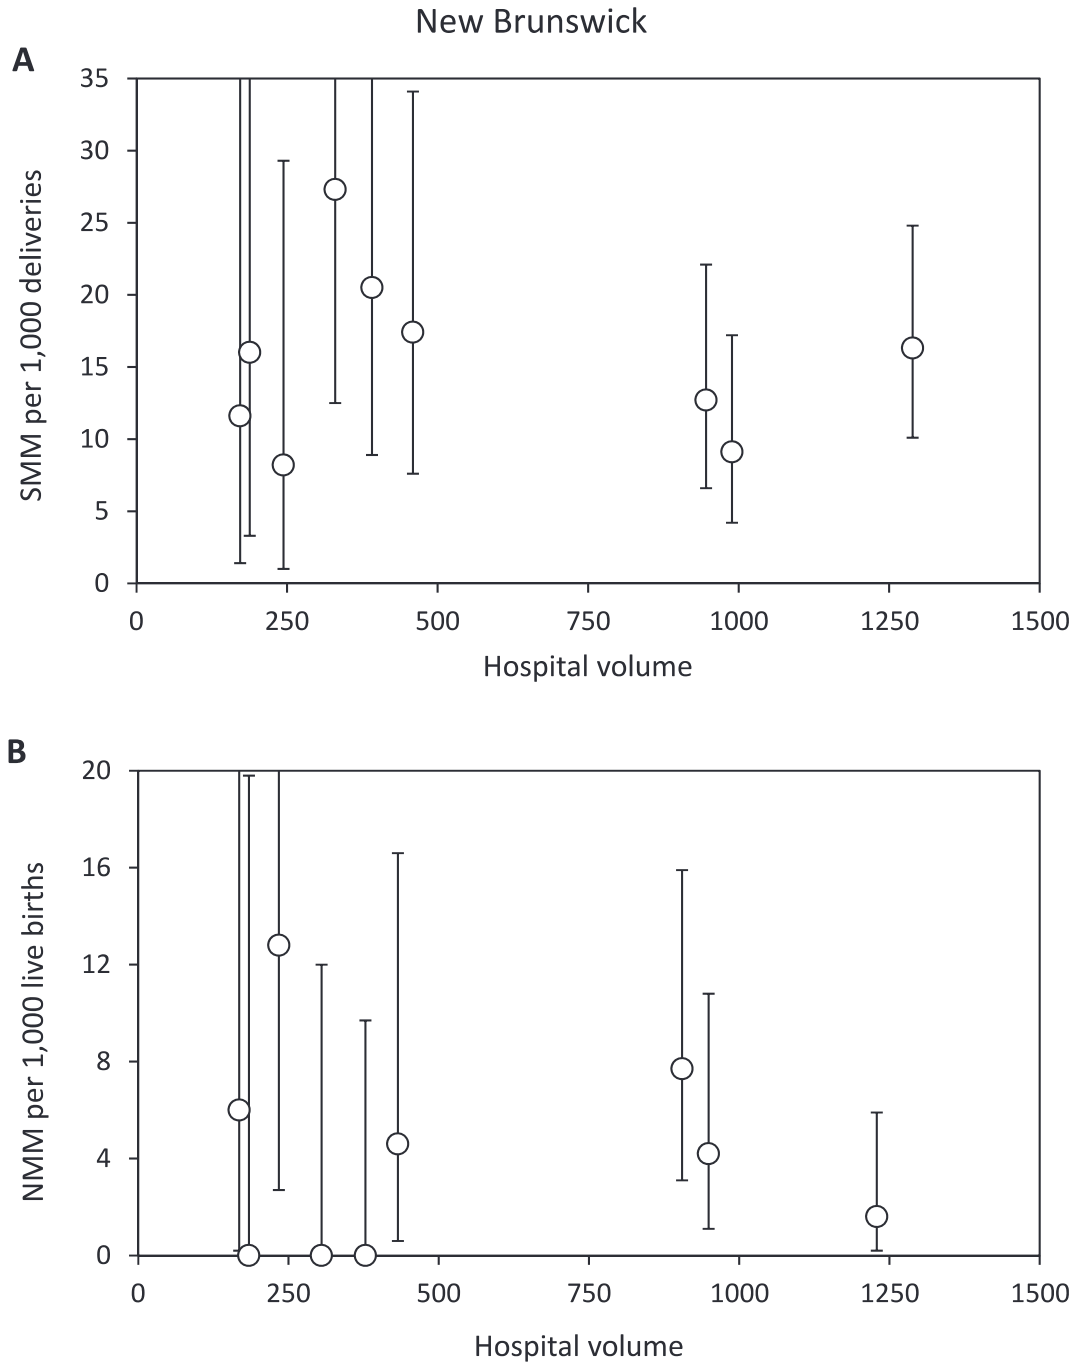

Figure 19. SMM and NMM rates by hospital volume, Nova Scotia.

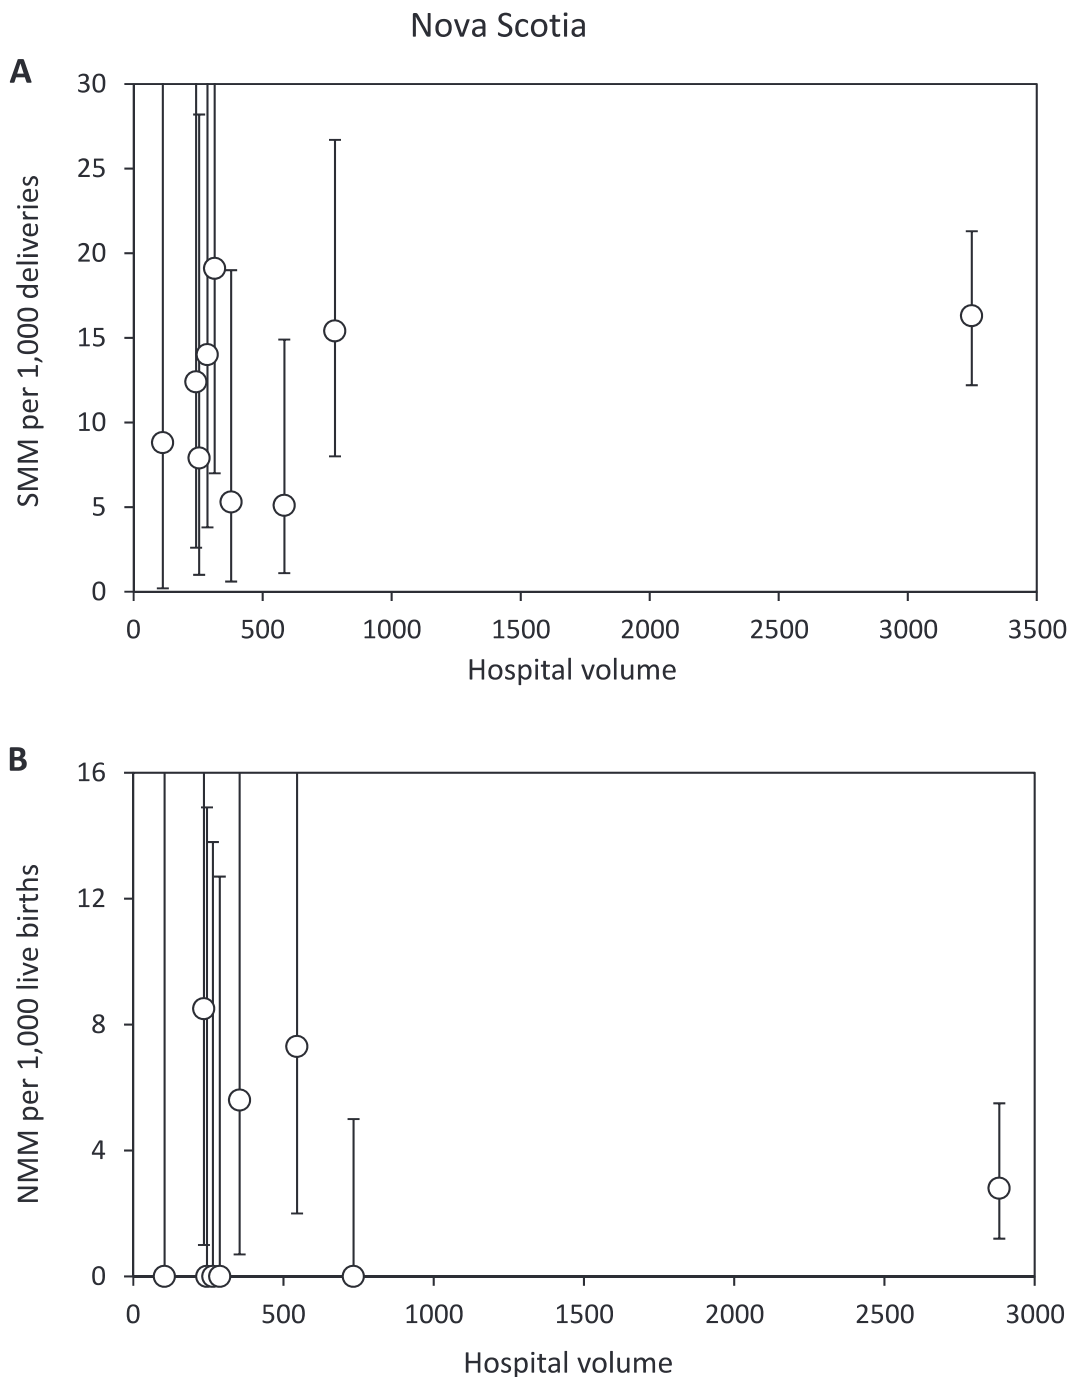

Figure 20. SMM and NMM rates by hospital volume, Prince Edward Island.

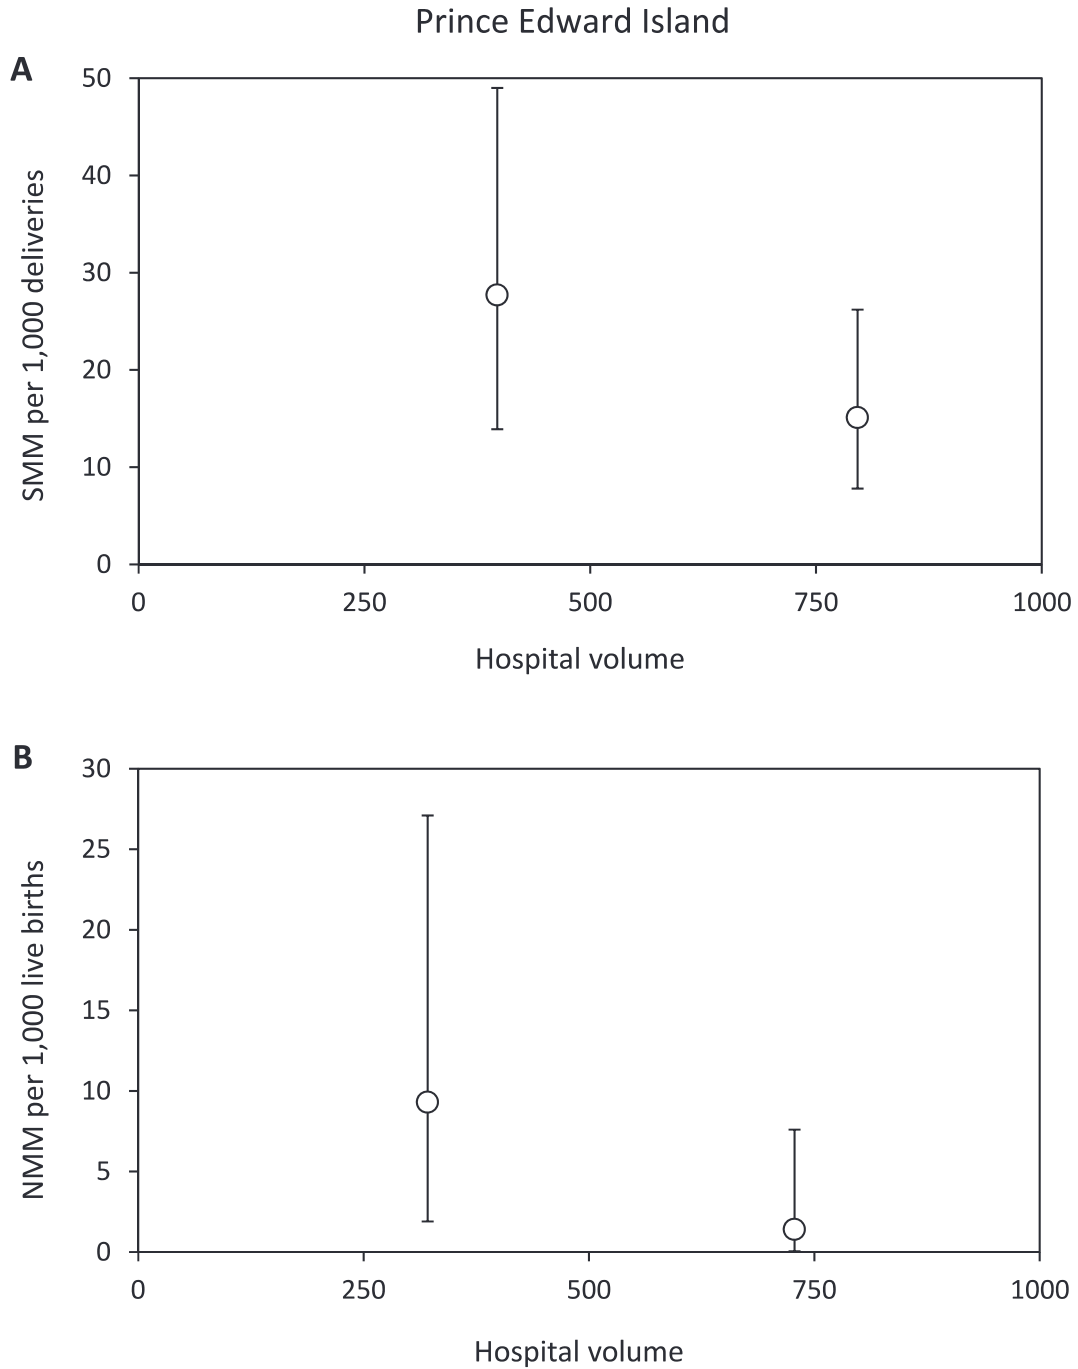



Figure 21. SMM and NMM rates by hospital volume, Newfoundland & Labrador.

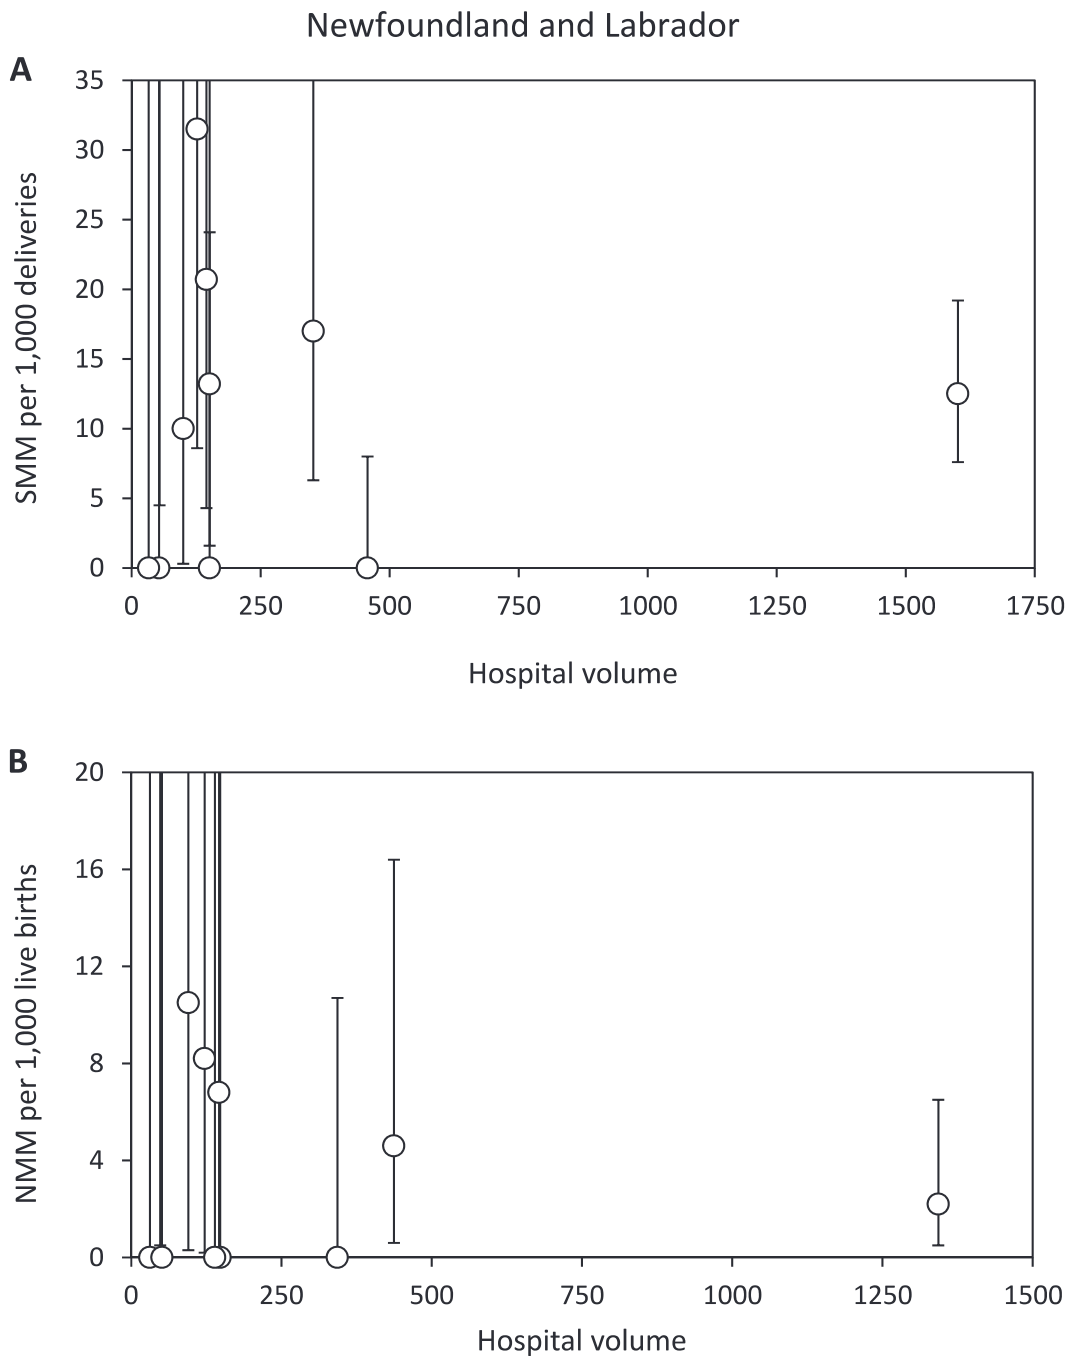

Figure 22. SMM and NMM rates by hospital volume, Combined Territories.

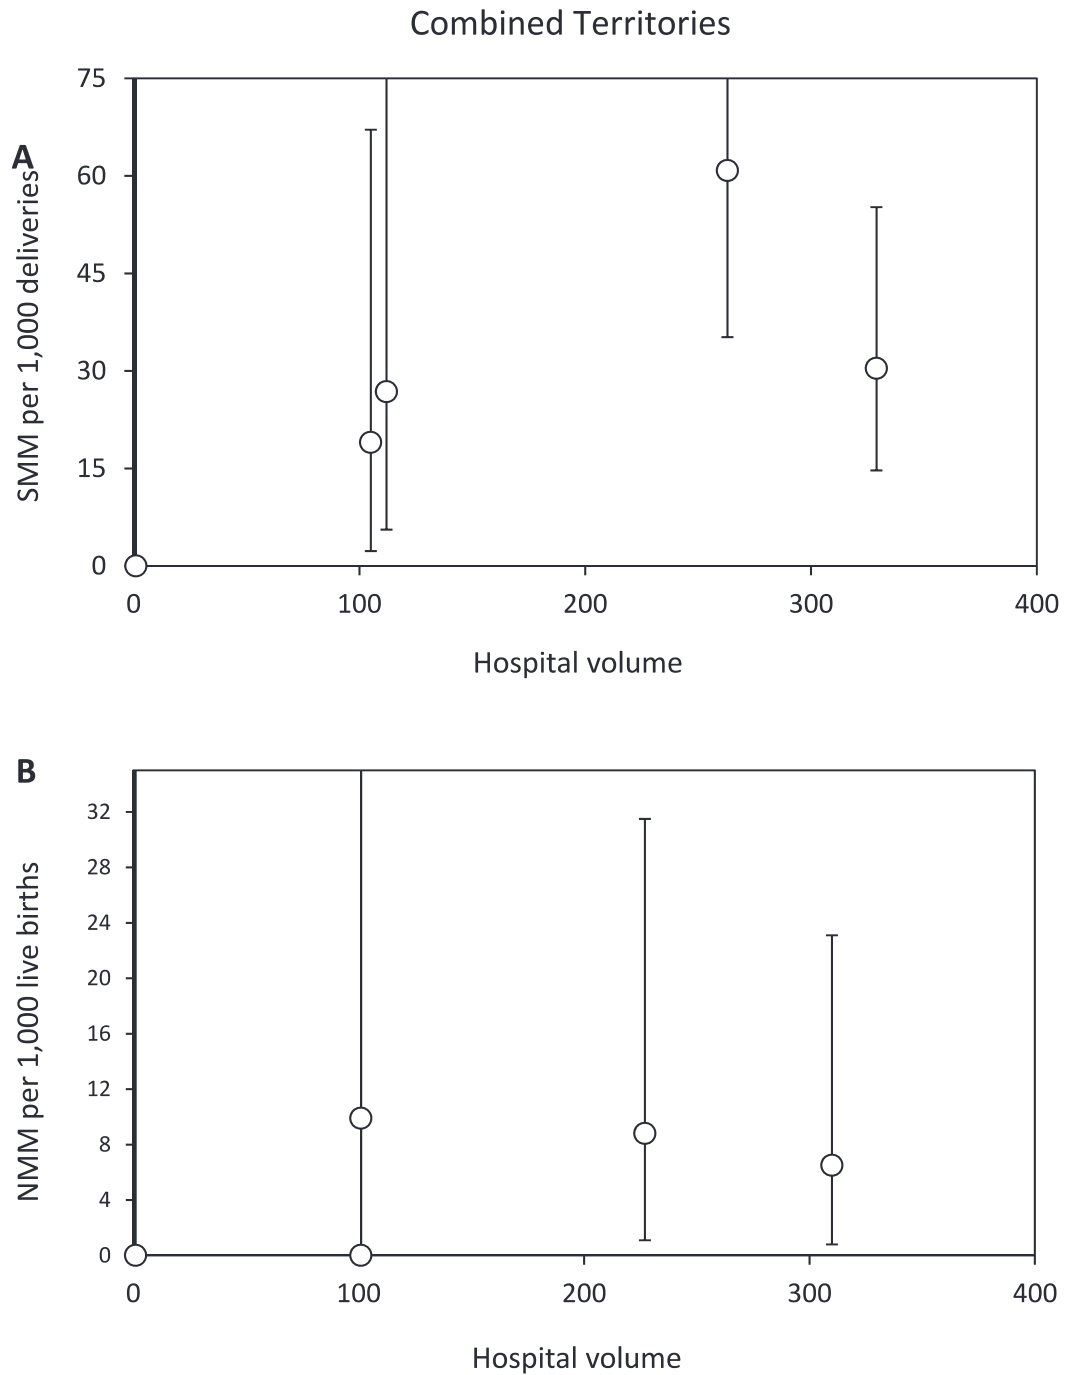

Supplement: 220928-res-1-at.pdf [file 220928-res-1-at.pdf]
